1 **Evaluation of variant calling algorithms for wastewater-based epidemiology using**  
2 **mixed populations of SARS-CoV-2 variants in synthetic and wastewater samples**

3 Irene Bassano<sup>1,2,\*</sup>, Vinoy K. Ramachandran<sup>1,\*</sup>, Mohammad S. Khalifa<sup>1,3</sup>, Chris J. Lilley<sup>1</sup>,  
4 Mathew R. Brown<sup>4</sup>, Ronny van Aerle<sup>1,5</sup>, Hubert Denise<sup>1</sup>, William Rowe<sup>1</sup>, Airey George<sup>6</sup>,  
5 Edward Cairns<sup>6</sup>, Claudia Wierzbicki<sup>6</sup>, Natalie D. Pickwell<sup>7</sup>, Myles Wilson<sup>7</sup>, Matthew  
6 Carlile<sup>7</sup>, Nadine Holmes<sup>7</sup>, Alexander Payne<sup>7</sup>, Matthew Loose<sup>7</sup>, Terry A. Burke<sup>8</sup>, Steve  
7 Paterson<sup>6</sup>, Matthew J. Wade<sup>1,4</sup>, Jasmine M.S. Grimsley<sup>1</sup>

8

9 <sup>1</sup> Environmental Monitoring for Health Protection, UK Health Security Agency, Nobel House, London SW1P  
10 3HX, UK

11 <sup>2</sup> Department of Infectious Disease, Imperial College London, London SW7 2AZ, UK

12 <sup>3</sup> Division of Biosciences, College of Health, Medicine and Life Sciences, Brunel University, London, UB8  
13 3PH, UK

14 <sup>4</sup> School of Engineering, Newcastle University, Newcastle-upon-Tyne NE1 7RU, UK

15 <sup>5</sup> International Centre of Excellence for Aquatic Animal Health, Cefas, Barrack Road, Weymouth, DT 8UB, UK

16 <sup>6</sup> Centre for Genomic Research & NERC Environmental Omics Facility, Institute of Infection, Veterinary and  
17 Ecological Sciences (IVES), University of Liverpool, Liverpool, L69 7ZB, UK

18 <sup>7</sup> DeepSeq, Centre for Genetics and Genomics, The University of Nottingham, Queen's Medical Centre,  
19 Nottingham, NG7 2UH, UK

20 <sup>8</sup> NERC Environmental Omics Facility, Ecology and Evolutionary Biology, School of Biosciences, University  
21 of Sheffield, Sheffield S10 2TN, UK

22 \* These authors contributed equally to this work.

23 <sup>□</sup> Corresponding author [Irene.Bassano@ukhsa.gov.uk](mailto:Irene.Bassano@ukhsa.gov.uk)

24

25 **Keywords:** Wastewater, Variant callers, Sequencing, SARS-CoV-2

26 **Abstract**

27 Wastewater-based epidemiology (WBE) has been used extensively throughout the COVID-  
28 19 pandemic to detect and monitor the spread and prevalence of SARS-CoV-2 and its  
29 variants. It has proven an excellent, complementary tool to clinical sequencing, supporting  
30 the insights gained and helping to make informed public health decisions. Consequently,  
31 many groups globally have developed bioinformatics pipelines to analyse sequencing data  
32 from wastewater. Accurate calling of mutations is critical in this process and in the  
33 assignment of circulating variants, yet, to date, the performance of variant-calling algorithms  
34 in wastewater samples has not been investigated. To address this, we compared the  
35 performance of six variant callers (VarScan, iVar, GATK, FreeBayes, LoFreq and BCFtools),  
36 used widely in bioinformatics pipelines, on 19 synthetic samples with known ratios of three  
37 different SARS-CoV-2 variants (Alpha, Beta and Delta), as well as 13 wastewater samples  
38 collected in London between the 15–18 December 2021. We used the fundamental  
39 parameters of recall (sensitivity) and precision (specificity) to confirm the presence of  
40 mutational profiles defining specific variants across the six variant callers.

41 Our results show that BCFtools, FreeBayes and VarScan found the expected variants with  
42 higher precision and recall than GATK or iVar, although the latter identified more expected  
43 defining mutations than other callers. LoFreq gave the least reliable results due to the high  
44 number of false-positive mutations detected, resulting in lower precision. Similar results were  
45 obtained for both the synthetic and wastewater samples.

## 46 **Introduction**

47 On March 11<sup>th</sup>, 2020, the World Health Organisation (WHO) declared a global pandemic  
48 following the rapid spread of a novel coronavirus, severe acute respiratory syndrome  
49 coronavirus 2 (SARS-CoV-2) [1], which causes coronavirus disease 19 (COVID-19). Since  
50 then, wastewater-based epidemiology (WBE) has proven a promising tool to detect and  
51 monitor SARS-CoV-2, act as a proxy for infections within certain regions/communities and  
52 provide an early-warning of disease outbreaks [2]. It has been widely used across the globe to  
53 complement conventional clinical surveillance, which is limited in population coverage,  
54 capacity or engagement (e.g., self-testing/reporting) [3]. In this regard, it is evident that WBE  
55 can be used to monitor disease prevalence in a community, allowing targeted public health  
56 measures to be implemented at relative pace and geographical specificity, in combination  
57 with other data. Moreover, WBE is non-invasive and less biased than clinical data, making it  
58 a valuable molecular surveillance tool [4, 5].

59 Since the initial outbreak of SARS-CoV-2, several variants of concern (VOCs), variants  
60 under investigation or monitoring (VUIs/VUMs) and variants of interest (VOIs) have  
61 circulated globally. According to the WHO, as of May 2022, there have been five VOCs  
62 (Alpha, Beta, Gamma, Delta and Omicron), eight VOIs (Epsilon, Zeta, Eta, Theta, Iota,  
63 Kappa, Lambda, Mu) and two VUIs (B.1.640 and XD) [6]. While VOCs have transmitted  
64 worldwide, VUIs are country-specific, with over 200 sub-lineages of the main circulating  
65 variants reported by individual countries [7]. In England, the Horizon Scanning Programme,  
66 part of the UK Health Security Agency (UKHSA), has been monitoring circulating variants,  
67 including VOC, VUI/VUM and VOIs, identified by deep sequencing of a large cohort of  
68 Covid-19 positive patients by COG-UK (Covid-19 Genomics UK) [8, 9]. Since the  
69 declaration of the pandemic, this totals over 2 million patients in the UK alone [10].  
70 However, the sequencing datasets generated lacked asymptomatic cases and cases not  
71 sequenced.

72 The Environmental Monitoring for Health Protection programme (EMHP), part of the  
73 UKHSA, has used reports produced by the Horizon Scanning Programme to monitor the  
74 same variants in wastewater collected in England. However, the analysis of SARS-CoV-2  
75 sequences from wastewater samples is more complicated than clinical samples obtained using  
76 nasopharyngeal swabs. Discrepancies between clinical and wastewater samples have been  
77 observed; in particular, the mixed strain nature of wastewater samples, the more degraded  
78 nature of viral genomes and, consequently, the inability to obtain consensus genome

79 sequence for each of the samples analysed. These differences can be accounted for by the  
80 nature and characteristics of the samples (wastewater vs clinical) and characteristics  
81 impacting the ability to extract and analyse the samples, such as virus titre, which is  
82 considerably lower in wastewater samples that, in turn, may affect variant calling such as  
83 sample preparation, with additional steps such as centrifugation and filtration methods  
84 required to purify the samples from chemicals and other sources of contamination and  
85 platform dependent sequencing errors [11-14].

86 Several bioinformatics pipelines have been developed to specifically detect SARS-CoV-2  
87 sequences and variants in wastewater samples, including ncore/viralrecon [15] and V-PIPE  
88 SARS-CoV-2 [16]. However, most studies have relied heavily on the ARTIC pipeline  
89 initially designed with clinical samples in mind, or, as in the case of the EMHP programme in  
90 England, an adaptation of this pipeline. Common sequencing pipelines, including ARTIC,  
91 involve the removal of low-quality sequencing reads, followed by read mapping and variant  
92 calling to define mutations found in the sample (Single Nucleotide Polymorphisms – SNPs –  
93 and INsertions/DEletions) [17]. This is performed by highly specialised tools known as  
94 variant callers. The ARTIC pipeline for sequence analysis of clinical samples utilises iVar,  
95 which relies on the samtools mpileup command as its variant calling function [17]. While this  
96 has been well documented in clinical studies, very little is known about its performance for  
97 wastewater samples. To address this knowledge gap, the EMHP programme in England  
98 adapted this protocol, using VarScan as an alternative to iVar, delivering significantly  
99 improved results when applied to wastewater samples [18, 19]. Before screening for sequence  
100 changes, VarScan uses the BAM alignment file as the input to score each of the reads  
101 produced during sequencing. If reads are found to align to multiple locations and/or are of  
102 low quality, they are automatically discarded. For the remaining reads, SNPs and Indels are  
103 compiled for each of the locations across the viral genome and validated depending on factors  
104 such as the overall coverage, the number of reads across the site of the mutation and base  
105 quality, among others.

106 Several genomic studies have compared and highlighted the impact that variant caller choice  
107 has on the analysis pipeline, including iVar [17], GATK [20], LoFreq [21], FreeBayes [22]  
108 and BCFtools [23]. FreeBayes is a haplotype-based variant caller where variants are called  
109 based on the sequences of reads aligned to a particular target rather than the specific  
110 alignment. One of the main advantages of this method is that it bypasses the problem of  
111 identical sequences that might align to multiple locations. On the other hand, GATK uses

112 HaplotypeCaller as a tool to call germline SNPs and Indels via local re-assembly of  
113 haplotypes [22]. More specifically, it assembles and realigns reads to their most likely  
114 haplotypes. Comparison with the reference of choice is used to calculate the likelihood of  
115 each possible genotype and call possible variants. LoFreq is a high-quality and highly  
116 sensitive tool to detect variants in heterogeneous samples, such as tumour samples [21]. It  
117 was developed under the assumption that it is hard to distinguish true variants from  
118 sequencing errors. In this regard, LoFreq is a very robust and sensitive variant caller that uses  
119 base-called quality values to call variants accurately. It differs from other callers as it can  
120 find SNPs and Indels at a frequency below the average sequencing error. As such, it is not  
121 ideal for low-coverage genomes. BCFtools is a collection of several commands, among  
122 which *call* is used for SNP/indel calling [23]. It generates the *mpileup* from the BAM  
123 alignment reads and then computes the variant calling. This step is the same as VarScan,  
124 which generates *mpileup* using SAMtools. iVar uses the output of the SAMtools *mpileup*  
125 command to call variants as VarScan and BCFtools; however, it is not adapted for use in  
126 mixed strain samples, such as those derived from wastewater where mixed populations are  
127 found in the same sample [17]. [24, 25]. Indeed, it is globally acknowledged that the  
128 detection of defining SNPs and Indels allows the assignment of VOCs, VUIs, VUMs and  
129 VOIs to wastewater samples, thus their accurate identification is paramount for variant  
130 detection in the context of WBE.

131 In this manuscript, we evaluated the performance of six different variant callers and their  
132 ability to detect SNPs and indels in samples containing a mixture of synthetic SARS-CoV-2  
133 control variants, as well as wastewater samples collected across Greater London during the  
134 pandemic.

135

136

## 137 **Methods**

### 138 **Sample library preparation and sequencing**

139 The synthetic SARS-CoV-2 control variant dataset contained samples that consisted of a mix  
140 of three variant genomes: Alpha (Control 15), Beta (Control 16) and Delta (Control 23)  
141 synthesised by TWIST Biosciences, USA (Table 1). For each sample in the synthetic dataset,  
142 three of these genomes were mixed in different ratios up to a total concentration of 200  
143 genome copies per  $\mu$ L, ranging from 0 to 100% of each synthetic genome, in quadruplicates.  
144 The mutation profile of each of the synthetic genomes is provided in Supplementary Table 1.  
145 Wastewater samples were collected between the 15–18 December 2021 in eight locations  
146 across the city of London, UK. Most of these samples were found to be positive for both the  
147 Delta and Omicron lineages using the bioinformatics pipeline developed by EMHP (data not  
148 shown). Wastewater samples were clarified, concentrated and RNA extracted according to  
149 the Quantification of SARS-CoV-2 in Wastewater General Protocol V1.0  
150 (<https://www.cefas.co.uk/media/offhscr0/generic-protocol-v1.pdf>). Sequencing libraries (tiled  
151 amplicons) were generated using the EasySeq™ SARS-CoV-2 WGS Library Prep Kit  
152 (Nimagen, The Netherlands) and the Nimagen V3 (wastewater samples) and V4 (synthetic  
153 samples) primer schemes, following the Wastewater Sequencing using the EasySeq™ RC-  
154 PCR SARS-CoV-2 (Nimagen) V2.0 protocol [26]. The libraries were sequenced on an  
155 Illumina NovaSeq 6000 (2x 150 bp) at the University of Liverpool sequencing centre  
156 (synthetic samples) or an Illumina NextSeq 500 (2x 150 bp) at the University of Nottingham  
157 sequencing centre (wastewater samples).

158

### 159 **Read pre-processing, mapping, primer trimming and variant calling**

160 The ARTIC pipeline (ncov2019-artic-nf; Illumina workflow) [27] was used to process the  
161 raw Illumina reads. Briefly, amplicon reads were pre-processed using Trim Galore v0.6.5  
162 [28], mapped to the reference SARS-CoV-2 genome (ENA GenBank Accession  
163 MN908947.3, NCBI NC\_045512.2) using BWA v0.7.17 [29], followed by primer trimming  
164 using iVar v1.3 and bed files containing the genome positions of the primers used to generate  
165 the amplicons (Nimagen V3 and V4 primer schemes for wastewater and synthetic samples,  
166 respectively). The resulting BAM files were sorted and subsequently indexed using  
167 SAMtools v1.13 [23] before analysis with six different variant callers; iVar v1.3.1, LoFreq  
168 v2.1.3.1, BCFtools v1.13, GATK Haplotypecaller v3.8, VarScan v2.4.4 and FreeBayes

169 v0.9.21. To avoid introducing biases across the variant callers, only parameters common to  
170 those available from VarScan were chosen. VarScan is the caller with the least number of  
171 parameters as it allows to only choose from min-coverage (Minimum read depth at a position  
172 to make a call), min-reads2 (Minimum supporting reads at a position to call variants), min-  
173 avg-qual (Minimum base quality at a position to count a read), min-var-freq (Minimum  
174 variant allele frequency threshold) and p-value (p-value threshold for calling variants). It  
175 should be also noted that it is practically impossible to test all the parameters from all the  
176 callers and leaving these in default is a preferred choice when performing comparison studies  
177 [30-32].

178 The ARTIC pipeline outputs a list of mutations (SNPs and indels) detected for each variant  
179 using iVar, but this was re-run separately after matching the common parameters across the  
180 various callers being investigated. All parameters are described in Supplementary file 1. The  
181 sorted, indexed and primer-trimmed BAM files were used directly to run variant calling with  
182 FreeBayes, iVar, BCFtools and VarScan, while LoFreq and GATK Haplotypecaller required  
183 first pre-processing of these BAM files. Since LoFreq required indel quality information in  
184 the BAM file to process indel calls, we used the LoFreq command *indelqual* to insert quality  
185 score for each indel, based on the dindel algorithm [33]. GATK Haplotypecaller, requires  
186 reads to be grouped (using *AddOrReplaceReadGroups* from Picard) and duplicates  
187 (*MarkDuplicatesSpark* from GATK) were marked before variant calling. All the variant  
188 callers generated outputs in the variant call format (vcf) files except iVar, which reported  
189 outputs as tsv (tab-separated values) files. A python script (*ivar\_variants\_to\_vcf.py*) was used  
190 to convert the tsv file to vcf format [15]. A python script (*ivar\_variants\_to\_vcf.py*) was used  
191 to convert the tsv file to vcf format [34].

192

### 193 **VCF file processing, analysis, and statistical methods**

194 QuasiModo is a tool that evaluates the results of strain resolved analyses on mixed strain  
195 samples including variant calling and genome assembly [35]. It does this by taking vcf files  
196 generated from the different variant callers and two genomic reference files, the first being  
197 the reference against which samples were mapped in the BAM file-generating process, and  
198 the second reference being a ground-truth genome known to be found in the mixed strain  
199 samples. We therefore evaluated the performance of the different variant callers by  
200 comparing lists of mutations identified by each of the variant callers to a second reference  
201 genome (for ground truthing). The reference SARS-CoV-2 genome sequence was

202 downloaded from NCBI Genbank (Accession No. MN908947.3) and the SARS-CoV-2  
203 variant genomes were obtained from GISAID: Alpha (EPI\_ISL\_601443), Beta  
204 (EPI\_ISL\_678597), Delta (EPI\_ISL\_1544014), Omicron-England (EPI\_ISL\_7718520),  
205 Omicron-Hong Kong (EPI\_ISL\_6841980), Omicron-Australia (EPI\_ISL\_7190366) and  
206 Gamma (EPI\_ISL\_792683). Briefly, sequences from each sample were aligned to the  
207 reference genomes using MUMmer4 [27] to identify SNPs and indels that are present in the  
208 ground-truth genome and each variant call was then categorised as either a true positive (TP),  
209 a false positive (FP), or a false negative (FN). A true positive is defined as one that was  
210 found by the variant caller being tested in both the sample and the reference. A true negative  
211 is a lack of a mutation detected by the variant caller where there is no mutation present in the  
212 reference file. A false positive is a mutation reported by the variant caller but not present in  
213 the original reference, while a false negative is a mutation not detected by the variant caller,  
214 but that is found in the reference [35-38].

215 These values are used to calculate the recall and precision, also known as sensitivity and  
216 specificity, respectively:

217 
$$\text{Recall (R, fraction of truly existing variants)} = \text{TP}/(\text{TP}+\text{FN})$$

218 
$$\text{Precision (P, fraction of predicted true variants)} = \text{TP}/(\text{TP}+\text{FP})$$

219 In addition, once recall and precision are calculated, a ratio of the two can be derived, known  
220 as the F1 score [35]:

221 
$$\text{F1} = 2 * (\text{P} * \text{R}) / (\text{P} + \text{R})$$

222

223 For the synthetic control samples, 455 vcf files (generated for 19 synthetic samples  
224 (quadruplicates) from six variant callers, with one failed replicate for GATK) were analysed  
225 using the MN908947.3 reference file as the mapping genome and each of the SARS-CoV-2  
226 variant reference genomes (Alpha, Beta, Delta, and Gamma). Similarly, for wastewater  
227 samples, we generated 77 vcf files from 13 unique samples among six variant callers, with  
228 one failed sample for GATK), using the MN908947.3 reference and each of the SARS-CoV-  
229 2 variant genomes (Alpha, Beta and Delta, Omicron (Hong Kong), Omicron (Australia) and  
230 Omicron (England) and Gamma; Table 1). The Gamma (P1) variant reference file (Table 1)  
231 served as a negative control in our bioinformatics analysis, as it was not included in the  
232 synthetic mixtures nor found in the wastewater samples. We adapted the method described by  
233 Deng et al. [35] to generate a table with calculated values for each of the vcf files, from



234 which recall, and precision were plotted using R v4.1.3 and ggplot2 [39]. Output from all the  
235 vcf files was used by *vcfstats* from the *vcflib* package [40] to generate variant statistics for  
236 each of the vcf files. *vcfstats* generates a two-column output for each vcf file, with counts for  
237 SNPs, MNPs (multiple nucleotide polymorphisms), Indels and various other parameters. The  
238 number of SNPs, Indels and MNPs for each vcf file were plotted using RStudio, ggplot2  
239 package [39]. Frequencies of the defining mutations for each of the variant genomes were  
240 extracted from the vcf files using BCFtools [23] and plotted using Rstudio, ggplot2 [39].

241 To test whether the distribution of precision, recall and F1 scores for each variant caller was  
242 significantly different from another, we applied the Kruskal-Wallis one-way analysis of  
243 variance test using the python scipy package v1.9.1 ([SciPy](#)). Following this, a post-hoc Dunn  
244 test using scikit-posthocs package v0.7.0 ([scikit-posthocs · PyPI](#)) was performed to evaluate  
245 the pairwise differences between callers. These tests were performed separately on the  
246 synthetic samples, the wastewater samples and both sets of samples together, for each score.  
247 Each set of quadruplicate synthetic samples were aggregated by median score before  
248 applying the relevant tests.

249

## 250 **Results**

### 251 **Sensitivity and specificity of six variant callers across mixed synthetic genome samples**

252 We ran VarScan, GATK, iVar, FreeBayes, LoFreq and BCFtools across 19 mixed ratio  
253 synthetic samples, in quadruplicates. Basic sequencing statistics for all the samples  
254 calculating recall, precision and F1 score values are summarised in Supplementary Figure  
255 7A.

256 We calculated recall and precision for each variant within the samples and plotted these  
257 separately for each variant caller (Figure 1A-D, Supplementary Figure 1A-D), by also  
258 highlighting the percentage of each variant in the mixed sample as described in Table 2.  
259 Given that all four replicates yielded very similar results (reliable technical replicates), we  
260 run the median of these for all the synthetic samples plots. As shown in Supplementary  
261 Figure 2, we picked three samples which only contained 100% of one specific variant in the  
262 mix, namely Alpha, Beta or Delta, (shown in Table 2 marked by \*) to show the validity of the  
263 replicates. They all had indeed a similar distribution of the 4 replicates.

264 Our results show that all the variant callers correctly identified each SARS-CoV-2 variant in  
265 the synthetic mixes. At the time of writing, the tools we used to evaluate the presence of  
266 variants in a mixed sample via evaluation of their mutational profile could not be applied for  
267 mixed samples containing more than two variants or strains; therefore, we investigated the  
268 correct identification of the percentage by analysing the variants independently rather than  
269 confirming that all variants were found simultaneously in the same sample. Our results  
270 suggest that in general, the greater the proportion of a variant (close to 100%), the greater the  
271 chance it was called correctly (Figure 1). Indeed, VarScan, BCFtools and FreeBayes correctly  
272 called the increased ratio of Alpha compared to the remaining variants in the mix, while iVar  
273 and LoFreq had a trend line where the increased concentration of the variants could not be  
274 observed as clearly as in the other callers, showing instead a lower precision and for the latter  
275 also a low recall (Supplementary Figure 1A-C, 7A). As expected, our negative control P1  
276 (Gamma) (Figure 1D) did not yield any significant results, with all samples having a very low  
277 precision and recall for every caller assessed. Specifically, we observed that samples with a  
278 ratio close to zero, thus with low concentration of a variant, tended to cluster together with  
279 low recall and low precision. Those with higher ratio for a variant, and therefore with more  
280 mutations to be detected across several variants, are distributed across the plot to reflect the  
281 increased recall, and for some callers, higher precision. Based on this initial observation,

282 BCFtools, VarScan and Freebayes had the highest precision, followed by iVar and GATK. In  
283 addition, iVar had the highest recall for each of the variants being assessed independently, via  
284 count of their TPs, FPs and FNs compared to the other callers. This was supported by a  
285 Dunn's test to compare the synthetic samples' precision, recall and F1 scores of each variant  
286 caller. It confirmed that the differences in precision and F1 scores for LoFreq were  
287 significantly different to the other callers ( $p < 0.01$ ) and iVar performed best for recall and  
288 the Dunn's test again confirmed this as statistically significant ( $p < 0.01$ , Supplementary  
289 Figure 7A).

290

### 291 **Sensitivity and specificity of six variant callers across wastewater samples from London**

292 We used wastewater samples collected between the 15–18 December 2021 from Greater  
293 London to assess whether the variant callers could identify the mutations with similar  
294 precision and recall as observed with the synthetic samples. Table 3 shows the list of the  
295 samples, dates and predicted variants known to be found in those samples and Supplementary  
296 Figure 7B shows basic sequencing statistics. Samples were predicted to contain a mix of the  
297 Omicron and/or Delta, AY.4.2 variants definitions (EMHP analysis based on PHE variant  
298 definition, data not shown). Given the genome similarity between the Delta and AY.4.2  
299 variants, we only carried out our analysis on the Delta variant mutations. Figure 2A-B shows  
300 that the variant callers recognised mutations that could be identified as Delta variant for some  
301 of the samples, which indeed show a higher precision and recall compared to others, while in  
302 Supplementary Figure 2A-B-D we show that Alpha, Beta or Gamma variants are not  
303 detected, as expected, since these were not expected to be found in the samples, compared to  
304 Delta which shows to be found in some of the samples (Supplementary Figure 2C). Indeed,  
305 when testing for Delta variant presence, we noticed a slight increase in the precision and  
306 recall for some of those samples, which suggests that those did contain SNPs and/or Indels  
307 that could be identified as being part of the Delta variant, namely S50 and S296, although the  
308 latter was not called by GATK. Consistent with the data in Table 3, some of the samples were  
309 found to not contain a Delta variant, such as sample S43, which indeed showed a low  
310 precision and recall for all the callers, while other samples with slightly higher values  
311 reflected that did contain a mix of both Omicron and Delta (samples S58, S292, S63). As  
312 shown for the synthetic samples, LoFreq was the only variant caller that called with the  
313 lowest precision for all the samples analysed, followed by iVar, while recall values for  
314 LoFreq were sparser, yet higher than the other callers.

315 Similarly, we tested the wastewater samples for the presence of the Omicron lineage (Figure  
316 3A-C). We used three different references representative of this variant, namely, England,  
317 Hong Kong, and Australia. As shown in Figure 3A-C and Supplementary Figure 4A-C, all  
318 three variants under analysis were found in our wastewater samples and at a higher level than  
319 the one at which the Delta variant was detected for specific samples expected to have either  
320 or both two variants. The degree to which each variant caller recognises the mutations varied,  
321 with LoFreq again returning the lowest recall and precision values compared to the other  
322 callers. This was consistent with the results obtained with the synthetic data. Based on the  
323 predicted detection indicated in Table 3, the two samples identified to contain a Delta based  
324 mutational profile as described above (S50 and S296), have now a low precision and recall  
325 when tested against any of the Omicron lineages, suggesting that in those samples we can  
326 predict to find a Delta variant rather than an Omicron. This was confirmed consistently for all  
327 the callers, although we also observed again that LoFreq did have low values as shown in the  
328 other plots and that GATK did not call S296. As for the synthetic samples, a Dunn's test of  
329 the pairwise scores confirmed that in terms of precision, GATK, VarScan and Freebayes  
330 were not significantly different from one other. However, the Dunn's test on recall showed  
331 iVar to be stochastically dominant. For the combined F1 score, the same test showed that  
332 only LoFreq was significantly different from each of the other tools ( $p < 0.01$ , Supplementary  
333 Figure 7B).

334

### 335 **Comparison of known variant defining mutations found in synthetic and wastewater** 336 **samples across the six variant callers**

337 We calculated the total number of known SNPs, Indels and MNPs (multi nucleotide  
338 polymorphisms) as described by Twist (synthetic samples) or PHE (wastewater samples) for  
339 each variant and compared these with those found in our synthetic (Figure 4A-F,  
340 Supplementary Figure 5A-F and Supplementary file 2) or wastewater samples (Figure 5A-F,  
341 Supplementary Figure 5A-F and Supplementary file 2) by each of the callers. SNPs/Indels  
342 bar plots were also shown in absence of LoFreq to show the divergence among all the callers  
343 on a different scale, as shown in Supplementary Figure 6A-D. In Figure 4A-F and 5A-F we  
344 used UpSet plots to show TPs for a subset of both synthetic and wastewater samples,  
345 respectively. For the synthetic samples we chose the three samples with 100% of a variant  
346 and one with a mix of the three (sample 12, Table 2). Among the wastewater samples, we  
347 chose six samples, representative of both Omicron lineages and Delta variants (Table 3,

348 samples highlighted in bold). As shown in Figure 4A-F, and in concordance with the data  
349 presented above, LoFreq did call a much higher number of mutations compared to all the  
350 other variant callers in all the synthetic samples analysed, leading to a high number of FNs.  
351 When looking in more detail at how many of those were the defining mutations for each of  
352 the reference genomes (Table 1), we found that all callers identified the majority of the  
353 expected mutations for the variants being investigated, except LoFreq which only found  
354 11/28 mutations for Alpha, 14/25 for Beta, and 20/37 for Delta (Figure 4A-B-C,  
355 Supplementary file 2). In addition, a set of 3 mutations was not detected by any of the variant  
356 callers for Alpha and Beta variants and 4 mutations for the Delta variant. The detailed  
357 number of defining expected mutations for all the callers are described in Supplementary file  
358 2.

359 For the synthetic mixed strain sample (Table 2, sample 12) we tested the presence of the  
360 defining mutations for Alpha, Beta and Delta (Figure 4D-E-F, respectively and  
361 Supplementary file 2) which were mixed in a 50:25:25 ratio, respectively. As summarised in  
362 Supplementary file 2, GATK called the lowest number of expected mutations for all the three  
363 variants, followed by VarScan and LoFreq. On the other hand, we found that iVar, FreeBayes  
364 and BCFtools were the callers with the highest number of expected mutations for all three  
365 variants profiled. Five mutations for the Alpha variants, 3 for the Beta and 8 for the Delta  
366 variant were not detected by any of the callers.

367 Similarly, we called variants for the wastewater samples (in bold Table 3, Figure 5A-F,  
368 Supplementary Figure 5B-D-F and Supplementary file 2) and observed the same pattern.  
369 More specifically, we investigated how many of the Delta, Omicron BA.1 and BA.2 defining  
370 mutations were detected by each of the variant callers across the samples and compared the  
371 numbers. As shown in Figure 5A-F, we found that, of all the mutations detected in the  
372 wastewater samples, 13/20 mutations for BA.2 were not detected by any of the variant callers  
373 (Supplementary file 2), yielding to a very low number of defining mutations found by each  
374 caller (up to 6 total mutations). For BA.1, who has a total of 17 defining mutations, LoFreq  
375 called the least number of expected mutations for sample S58 (7/17) and S263 (6/17).  
376 Overall, all the callers found between 6 to 16 defining mutations across the samples, with  
377 iVar having the highest number of expected mutations compared to the other callers: it  
378 detected all the 16/17 mutations for BA.1 in all samples, except 10/17 for S263 and 0/17 for  
379 S296. When looking at the Delta variant defining mutations, as observed for the other  
380 variants, there is a degree of difference within the same sample, e.g., iVar and LoFreq called

381 8/17 and 9/17 defining mutations, respectively for sample S63, but all the others only 3/17.  
382 Overall, iVar seemed to have performed well for the Delta variant where it called the highest  
383 number of expected mutations (Supplementary file 2).

384 Similarly, bar plots showing the number of total SNPs, Indels and MNPs across the samples  
385 for the six variant callers were also calculated. This is shown in Supplementary Figure 5A-F,  
386 for both synthetic and the real wastewater samples, and in absence of LoFreq in  
387 Supplementary Figure 6A-D. Interestingly, not all the variant callers were able to recognise  
388 MNPs. As shown in Supplementary Figure 5E-F only FreeBayes and iVar found this type of  
389 mutations across both synthetic and real wastewater samples.

390

### 391 **Comparison of alternate allele frequencies across the six variant callers**

392 We extrapolated the alternate allele frequencies values from the vcf files for both the  
393 synthetic and wastewater samples across the six variant callers to look if these were called  
394 similarly. Degenerate codons were not plotted for any of the callers. In Figure 6A-C  
395 (synthetic) and Figure 6D-F (wastewater) we plot all the defining mutations for the variants  
396 of interest across all the 19 synthetic or the 13 wastewater samples. Frequencies are coloured  
397 by gradient.

398 Among the synthetic samples, all the callers had the same frequency for those samples where  
399 there was a high proportion of a variant (75-100%), such as samples 1 and 7 for Alpha  
400 (Figure 6A), sample 2 for Beta (Figure 6B) and samples 3 and 17 for Delta (Figure 6C). For  
401 the remaining samples, frequencies were similar, although iVar called more mutations than  
402 others, but at very low frequency. Similarly, for the wastewater samples we plotted  
403 frequencies for defining mutation for Omicron BA.1 (Figure 6D), BA.2 (6E) and Delta (6F)  
404 variants. BA.1 mutation frequencies were called at the same level across all the callers. In  
405 particular, samples S58, S63 and S292 were the ones with the highest number of mutations  
406 detected by all callers, at the same high frequency. All three samples were found to be  
407 positive for Omicron from previous data analysis (data not shown). Some mutations, such as  
408 Q19E were not called by any of the callers. It is worth highlighting that at the time the  
409 original samples were analysed (December 2021) there was no clear distinction between  
410 BA.1 and BA.2. Frequencies for BA.2 (Figure 6E) were also similar across the callers,  
411 although only a subset of these were detected, suggesting that more likely the BA.1 subgroup  
412 was the one circulating at that time. As for the Delta variant, two samples, S50 and S296,

413 showed high frequency and were consistent among all the callers. Other samples were called

414 similarly, with no evident differences.

415

## 416 **Discussion**

417 In this paper we have analysed six variant callers commonly used in bioinformatics data  
418 analysis to empirically quantify their ability to identify mutations across mixtures of synthetic  
419 samples with known mutations as well as a set of wastewater samples with an unknown  
420 number of mutations. We first calculated recall and precision across the full genome for all  
421 the samples to define ground differences across the callers, to then focus in more detail on a  
422 set of defining mutations, by comparing how many of these were found and at which  
423 frequency by each of the callers. Our results suggest that the variant callers that showed the  
424 highest precision when looking at all samples together (synthetic and real wastewater  
425 samples) were GATK and VarScan followed by BCFtools and FreeBayes, which instead  
426 showed sparser data points. LoFreq and iVar showed the lowest precision values  
427 (Supplementary Figure 7C). Recall values were the lowest for GATK (and very sparse  
428 values), while they were significant statistical differences among the rest of the callers (in  
429 particular iVar's stochastic dominance). Overall, the F1 score confirmed that LoFreq was the  
430 least sensitive (Supplementary Figure 7C), presenting numbers of mutations that are  
431 magnitudes larger than the rest, and subsequently with a lower precision. On the other hand,  
432 when focusing on selected mutations, iVar identified the highest number of expected defining  
433 mutations across both synthetic and wastewater samples, compared to the other callers.

434 Wastewater-based epidemiology (WBE) has been used for many years to monitor key  
435 pathogens such as polio [41-45]. However, it has undergone a renaissance during the SARS-  
436 CoV-2 pandemic, with many tools and software specifically designed to detect the virus in  
437 wastewater and being developed in the wake of WBE monitoring [46-50]. As such, tools used  
438 to detect the virus in clinical samples were used as templates, but in many cases, these did not  
439 reflect the composition of the wastewater samples accurately, e.g., the mixed strain nature as  
440 well as degradation of the viral RNA in the environment, thus the lack of a complete genome,  
441 and more importantly the lack of a consensus sequence. These nuances impact and should  
442 inform downstream analysis at the bioinformatics level: sequences could only be a fraction of  
443 the genome, as the samples may be highly degraded, and the lack of a consensus will affect  
444 the ability to assign a variant to a sample [51, 52]. Subsequently variant analysis is limited to  
445 a shorter region in some cases and variant assignment has to happen based on specific  
446 mutations known to define a variant, as used for clinical cases [53]. For this reason, a variant  
447 caller that adapts to the type of data available is very important as it will be expected to call  
448 the mutations with higher sensitivity.



449 The six callers analysed in this paper have many aspects in common as well as significant  
450 differences. For example, of all the callers LoFreq is the only one that requires base quality  
451 information to call variants, making this method much more stringent and robust than the  
452 others, but similarly prone to call many more mutations than expected [21], as seen in our  
453 results. In addition, it has been reported that LoFreq can efficiently recognise sequencing  
454 errors from expected mutations in non-environmental samples, however, it seems that it did  
455 not behave as efficiently in our wastewater samples nor with the synthetic samples. This  
456 could also be a consequence that more specific combinations of parameters have to be chosen  
457 for efficient performance. Although for some samples the recall was correct, the precision  
458 was lower indicating the lower efficiency. Indeed, LoFreq is a fast and sensitive variant caller  
459 that calls many mutations that, however, are not true positive, hence low recall and precision  
460 as found in our results. We suggest that this tool is more suited for shorter viral sequences,  
461 and more likely in samples with higher coverage. Similarly, GATK was designed to detect  
462 genomes across a range of sample sources, but not environmental, and this is reflected in the  
463 highly comprehensive set of parameters available to efficiently analyse the datasets (over 111  
464 parameters) [20], but most of GATK parameters are not applicable to wastewater datasets.  
465 These aspects also highlight the difficulty in using these two tools for wastewater data, in  
466 contrast to FreeBayes, BCFtools or VarScan, which are functional and easy to apply in non-  
467 clinical settings. Nevertheless, we found that compared to most of the callers analysed,  
468 GATK did find the majority of the expected mutations (TPs) as well as overall good scores  
469 for recall and precision, suggesting that applying different sets of parameters might improve  
470 its functionality for environmental samples as well. This applies to LoFreq as well.

471 The selected variant callers have been extensively used in other fields for comparison  
472 purposes. For example, a recent paper comparing the efficiency of different mappers and  
473 callers in plant NGS data found that GATK was the best caller among those tested,  
474 suggesting that the type of data greatly affects not only the results but also the choice of tools  
475 used to analyse the datasets [30, 54, 55]. Although GATK was not the best of the callers in  
476 our study, we suggest these results are valid given the diversity of the datasets; namely, the  
477 plant genome being of better quality and not containing mixed strains compared to the  
478 wastewater, secondly, the fact that not always the expected mutations are known, thus many  
479 more mutations will account as TP or FP. This is independent of the pathogen studied, since  
480 most of the tools are widely applicable in different fields. Similarly, another study looking at  
481 exome sequencing also found that among the variant callers analysed, GATK

482 UnifiedGenotyper performed best [54]. We suggest that looking at shorter regions of a  
483 genome, such as exons, has its advantage since it allows us to work with a relatively smaller  
484 and highly covered region. In addition, compared to the above paper, we used GATK  
485 Haplotypecaller, which is known to have a different algorithm for calling variants than  
486 GATK UnifiedGenotyper.

487 It should also be noted that many of the parameters within each of these variant callers were  
488 left in default in our analysis. In fact, the wide choice of parameters poses a risk on its own  
489 when comparing different tools as it introduces biases. In an ideal setting, the correct  
490 procedure will imply that all parameters are tested and those reflecting an outcome that is  
491 expected are then chosen. In this paper we did not assume a certain output as we did not use  
492 all the possible parameters and because we were not expecting similar results between the  
493 callers. Indeed, a small test using FreeBayes showed us that changing certain key parameters  
494 yielded many different outputs, all of them being acceptable results (data not shown).  
495 Because these parameters are not shared or found in other callers, the comparison could not  
496 be achieved, as it would have introduced an advantage or disadvantage for some callers. This  
497 is in agreement with current literature, where on many occasions' parameters are left in  
498 default [30-32]. A direct consequence of this is that many results across our data would have  
499 had a different outcome. Indeed, LoFreq results might differ enormously if we had  
500 considered and adjusted all the parameters accordingly, irrespective of whether these were  
501 common to other variant callers.

502 It should be noted that calculating recall and precision for samples containing a mix of  
503 variants (two or more), is a cumbersome task, as some mutations can be shared among the  
504 variants, which will affect the ground truth. At the time of writing Deng et al., [35] designed  
505 a tool, where only samples with a mix of two genomes can be used. However, as of now there  
506 is no tool available for samples with a mix of three or more genomes. Wastewater are mixed  
507 samples, sometimes containing more than two variants. However, this notion will only be  
508 confirmed overtime, through sequencing of clinical cases. Therefore, with the aim to reflect  
509 real wastewater data, we calculated recall and precision for each variant known to be  
510 prevalent as it would be at that time that specific variant would have been circulating. This  
511 will inevitably overestimate the number of FP in each run as it should be calculated only once  
512 per sample, but it is however expected: any position not found to be a TP for one variant, will  
513 show as a FP. But, by testing each of the variants separately, this will give us the correct TP

514 which are the values we have been using in our manuscript to compare the callers (defining  
515 mutations).

## 516 **Conclusion**

517 In conclusion, we suggest that callers such as Varscan, BCFtools and Freebayes are overall  
518 preferable (Supplementary Figure 7C), particularly when mutations are not known as they are  
519 called with higher specificity and sensitivity.

520 However, if specific mutations are under investigation and expected in the output, such as the  
521 ones we used as variant-defining, iVar performed best.

522 We also suggest that, upon choice of one variant caller for a specific study other than  
523 comparison purposes, all parameters should be explored and tested to better improve the  
524 calling capability.

525 In the future, tools that can analyse mixed samples without the need to run the strains  
526 separately are also preferred as they will give even more accurate values of recall and  
527 precision.

528 **Author contribution**

| <b>Contributor Role</b>  | <b>Role Definition</b>                                                                                                                                                                                                                                                                                                                  |
|--------------------------|-----------------------------------------------------------------------------------------------------------------------------------------------------------------------------------------------------------------------------------------------------------------------------------------------------------------------------------------|
| <b>Conceptualisation</b> | Ideas: formulation or evolution of overarching research goals and aims: Irene Bassano, Mathew Brown                                                                                                                                                                                                                                     |
| <b>Methodology</b>       | Development or design of methodology; creation of models: Irene Bassano, Vinoy Ramachandran, Mohammad Khalifa, Chris Lilley                                                                                                                                                                                                             |
| <b>Software</b>          | Programming, software development; designing computer programs; implementation of the computer code and supporting algorithms; <u>testing of existing code components</u> : Vinoy Ramachandran, Mohammad Khalifa, Irene Bassano, Chris Lilley                                                                                           |
| <b>Validation</b>        | Verification, whether as a part of the activity or separate, of the overall replication/reproducibility of results/experiments and other research outputs: Irene Bassano, Vinoy Ramachandran, Chris Lilley, Ronny van Aerle, Hubert Denise, William Rowe, Mohammad Khalifa                                                              |
| <b>Formal Analysis</b>   | Application of statistical, mathematical, computational, or other formal techniques to analyse or synthesise study data: Chris Lilley, Irene Bassano, Vinoy Ramachandran                                                                                                                                                                |
| <b>Investigation</b>     | Conducting a research and investigation process, specifically performing the experiments, or data/evidence collection: Irene Bassano, Vinoy Ramachandran, Hubert Denise, William Rowe, Lilley Chris, George Airey, Cairns Edward, Wierzbicki Claudia, Pickwell Natalie D, Wilson Myles, Carlile Matthew, Holmes Nadine, Payne Alexander |
| <b>Resources</b>         | Provision of study materials, reagents, materials, patients, laboratory samples, animals, instrumentation, computing resources, or other analysis tools: Steve Paterson, Matthew Loose, Terry Burke, Matthew Wade, Jasmine Grimsley                                                                                                     |

|                                             |                                                                                                                                                                                                                                                  |
|---------------------------------------------|--------------------------------------------------------------------------------------------------------------------------------------------------------------------------------------------------------------------------------------------------|
| <b>Data Curation</b>                        | Management activities to annotate (produce metadata), scrub data and maintain research data (including software code, where it is necessary for interpreting the data itself) for initial use and later reuse: Irene Bassano, Vinoy Ramachandran |
| <b>Writing – Original Draft Preparation</b> | Creation and/or presentation of the published work, specifically writing the initial draft (including substantive translation): Irene Bassano, Vinoy Ramachandran                                                                                |
| <b>Writing – Review and Editing</b>         | Preparation, creation and/or presentation of the published work by those from the original research group, specifically critical review, commentary or revision – including pre- or post-publication stages: All authors                         |
| <b>Visualisation</b>                        | Preparation, creation and/or presentation of the published work, specifically visualisation/data presentation: Vinoy Ramachandran, Mohammad Khalifa, Chris Lilley                                                                                |
| <b>Supervision</b>                          | Oversight and leadership responsibility for the research activity planning and execution, including mentorship external to the core team: Irene Bassano, Matthew Wade, Jasmine Grimsley                                                          |
| <b>Project Administration</b>               | Management and coordination responsibility for the research activity planning and execution: Irene Bassano, Jasmine Grimsley                                                                                                                     |

529

530 **Conflicts of interest**

531 The authors declare no conflict of interest.

532 **Funding**

533 Acquisition of the financial support for the project leading to this publication: This work was  
534 supported by the UK Health Security Agency, the Natural Environment Research Council  
535 (NERC) Environmental Omics Facility (NEOF), and NERC grant NE/V010441/1 to Terry  
536 Burke.

537 **Acknowledgements**

538 We are grateful to Dr Zhi-Luo Deng from the Department of Computational Biology of  
539 Infection Research, Helmholtz Centre for Infection Research for helpful discussions and  
540 comments, help in installing, running and updating scripts to calculate recall and precision  
541 (Quasimodo), Rachel Tucker and Tom Holden from NERC Environmental Omics Facility,  
542 Ecology and Evolutionary Biology, School of Biosciences, University of Sheffield for  
543 technical assistance.

544 **Data availability**

545 Sequencing data is available upon request .

546 **Bibliography**

- 547 1. Cucinotta, D. and M. Vanelli, *WHO Declares COVID-19 a Pandemic*. Acta Biomed, 548 2020. **91**(1): p. 157-160.
- 549 2. Aguiar-Oliveira, M.L., et al., *Wastewater-Based Epidemiology (WBE) and Viral*  
550 *Detection in Polluted Surface Water: A Valuable Tool for COVID-19 Surveillance-A*  
551 *Brief Review*. Int J Environ Res Public Health, 2020. **17**(24).
- 552 3. Peccia, J., et al., *Measurement of SARS-CoV-2 RNA in wastewater tracks community*  
553 *infection dynamics*. Nat Biotechnol, 2020. **38**(10): p. 1164-1167.
- 554 4. Sutton, M., et al., *Detection of SARS-CoV-2 B.1.351 (Beta) Variant through*  
555 *Wastewater Surveillance before Case Detection in a Community, Oregon, USA*.  
556 Emerg Infect Dis, 2022. **28**(6).
- 557 5. Mallapaty, S., *How sewage could reveal true scale of coronavirus outbreak*. Nature,  
558 2020. **580**(7802): p. 176-177.
- 559 6. WHO. *Tracking SARS-CoV-2 variants*. 2022 [cited 2022 May 2022]; Available from:  
560 <https://www.who.int/en/activities/tracking-SARS-CoV-2-variants/>.
- 561 7. NCBI, *SARS-CoV-2 Variants Overview*. 2022.
- 562 8. UKHSA. *Emerging infections: horizon scanning*. 2010 [cited 2022; Available from:  
563 <https://www.gov.uk/government/collections/emerging-infections>.
- 564 9. UKHSA, *Investigation of SARS-CoV-2 variants: technical briefings*. 2022.
- 565 10. UKHSA, *UK completes over 2 million SARS-CoV-2 whole genome sequences*. 2022.
- 566 11. Xiao, A., et al., *Metrics to relate COVID-19 wastewater data to clinical testing*  
567 *dynamics*. medRxiv, 2021.
- 568 12. Wolfe, M.K., et al., *High-Frequency, High-Throughput Quantification of SARS-CoV-*  
569 *2 RNA in Wastewater Settled Solids at Eight Publicly Owned Treatment Works in*  
570 *Northern California Shows Strong Association with COVID-19 Incidence*. mSystems,  
571 2021. **6**(5): p. e0082921.
- 572 13. Weidhaas, J., et al., *Correlation of SARS-CoV-2 RNA in wastewater with COVID-19*  
573 *disease burden in sewersheds*. Sci Total Environ, 2021. **775**: p. 145790.
- 574 14. Peinado, B., et al., *Improved methods for the detection and quantification of SARS-*  
575 *CoV-2 RNA in wastewater*. Sci Rep, 2022. **12**(1): p. 7201.
- 576 15. Ewels, P.A., et al., *The nf-core framework for community-curated bioinformatics*  
577 *pipelines*. Nat Biotechnol, 2020. **38**(3): p. 276-278.
- 578 16. Posada-Céspedes, S., et al., *V-pipe: a computational pipeline for assessing viral*  
579 *genetic diversity from high-throughput data*. Bioinformatics, 2021.
- 580 17. Grubaugh, N.D., et al., *An amplicon-based sequencing framework for accurately*  
581 *measuring intrahost virus diversity using PrimalSeq and iVar*. Genome Biol, 2019.  
582 **20**(1): p. 8.
- 583 18. Koboldt, D.C., et al., *VarScan: variant detection in massively parallel sequencing of*  
584 *individual and pooled samples*. Bioinformatics, 2009. **25**(17): p. 2283-5.
- 585 19. Mathew R. Brown, M.J.W., Shannon McIntyre-Nolan, Irene Bassano,, D.B. Hubert  
586 Denise, John Bentley, Joshua T. Bunce, Jasmine Grimsley, Alwyn , and T.H. Hart,  
587 Aaron Jeffries, Steve Paterson, Mark Pollock, Jonathan Porter, David Smith4 Ronny  
588 van Aerle, Glenn Watts, Andrew Engeli, Gideon Henderson, *Wastewater Monitoring*  
589 *of SARS-CoV-2 Variants in England: Demonstration Case Study for Bristol (Dec*  
590 *2020 - March 2021) Summary for SAGE 08/04/21*. 2021.
- 591 20. McKenna, A., et al., *The Genome Analysis Toolkit: a MapReduce framework for*  
592 *analyzing next-generation DNA sequencing data*. Genome Res, 2010. **20**(9): p. 1297-  
593 303.

- 594 21. Wilm, A., et al., *LoFreq: a sequence-quality aware, ultra-sensitive variant caller for*  
595 *uncovering cell-population heterogeneity from high-throughput sequencing datasets.*  
596 *Nucleic Acids Res*, 2012. **40**(22): p. 11189-201.
- 597 22. Garrison, E. and G. Marth, *Haplotype-based variant detection from short-read*  
598 *sequencing*. 2012.
- 599 23. Danecek, P., et al., *Twelve years of SAMtools and BCFtools*. 2021.
- 600 24. Olm, M.R., et al., *inStrain profiles population microdiversity from metagenomic data*  
601 *and sensitively detects shared microbial strains.* *Nat Biotechnol*, 2021. **39**(6): p. 727-  
602 736.
- 603 25. Costea, P.I., et al., *metaSNV: A tool for metagenomic strain level analysis.* *PLoS One*,  
604 2017. **12**(7): p. e0182392.
- 605 26. Jeffries, A., et al. *Wastewater Sequencing using the EasySeq™ RC-PCR SARS CoV-2*  
606 *(Nimagen) V2.0 V.2.* 2022; Available from:  
607 [https://www.protocols.io/view/wastewater-sequencing-using-the-easyseq-rc-pcr-sar-](https://www.protocols.io/view/wastewater-sequencing-using-the-easyseq-rc-pcr-sar-81wgb7bx3vpk/v2)  
608 [81wgb7bx3vpk/v2](https://www.protocols.io/view/wastewater-sequencing-using-the-easyseq-rc-pcr-sar-81wgb7bx3vpk/v2).
- 609 27. Loman, N., W. Rowe, and A. Rambaut, *nCoV-2019 novel coronavirus bioinformatics*  
610 *protocol*. 2020.
- 611 28. Krueger, F. *Trim Galore*. 2021; Available from:  
612 <https://zenodo.org/record/5127899#.YoQSyXXMI2w>.
- 613 29. Li, H. and R. Durbin, *Fast and accurate short read alignment with Burrows-Wheeler*  
614 *transform*. *Bioinformatics*, 2009. **25**(14): p. 1754-60.
- 615 30. Schilbert, H.M., A. Rempel, and B. Pucker, *Comparison of Read Mapping and*  
616 *Variant Calling Tools for the Analysis of Plant NGS Data.* *Plants (Basel)*, 2020. **9**(4).
- 617 31. Xu, C., *A review of somatic single nucleotide variant calling algorithms for next-*  
618 *generation sequencing data.* *Comput Struct Biotechnol J*, 2018. **16**: p. 15-24.
- 619 32. Sandmann, S., et al., *Evaluating Variant Calling Tools for Non-Matched Next-*  
620 *Generation Sequencing Data.* *Sci Rep*, 2017. **7**: p. 43169.
- 621 33. Albers, C.A., et al., *Dindel: accurate indel calls from short-read data.* *Genome Res*,  
622 2011. **21**(6): p. 961-73.
- 623 34. Wilson; Erika; Katrin Sameith; Maxime U. Garcia; jcurado; Kevin Menden,  
624 H.P.S.V.S.M.J.E.-C.M.L.H.n.-c.b.A.U.G.G.P.E.M.S.K.S. *nf-core/viralrecon: nf-*  
625 *core/viralrecon v2.5 - Manganese Monkey*. 2022; Available from:  
626 <https://zenodo.org/record/6827984#.Yxm4OKHMI2w>.
- 627 35. Deng, Z.L., et al., *Evaluating assembly and variant calling software for strain-*  
628 *resolved analysis of large DNA viruses.* *Brief Bioinform*, 2021. **22**(3).
- 629 36. Schmidt, J., et al., *Genotyping of familial Mediterranean fever gene (MEFV)-Single*  
630 *nucleotide polymorphism-Comparison of Nanopore with conventional Sanger*  
631 *sequencing.* *PLoS One*, 2022. **17**(3): p. e0265622.
- 632 37. Parikh, R., et al., *Understanding and using sensitivity, specificity and predictive*  
633 *values.* *Indian J Ophthalmol*, 2008. **56**(1): p. 45-50.
- 634 38. Olson, N.D., et al., *Best practices for evaluating single nucleotide variant calling*  
635 *methods for microbial genomics.* *Front Genet*, 2015. **6**: p. 235.
- 636 39. Wickham, H., *ggplot2: Elegant Graphics for Data Analysis*. 2016.
- 637 40. Garrison E., K.Z.N., Dawson E.T., Pedersen B.S., Prins P., *Vcflib and tools for*  
638 *processing the VCF variant call format*. 2021.
- 639 41. Pogka, V., et al., *Laboratory Surveillance of Polio and Other Enteroviruses in High-*  
640 *Risk Populations and Environmental Samples.* *Appl Environ Microbiol*, 2017. **83**(5).
- 641 42. Pavlov, D.N., et al., *Prevalence of vaccine-derived polioviruses in sewage and river*  
642 *water in South Africa.* *Water Res*, 2005. **39**(14): p. 3309-19.
- 643 43. Paul, J.R., J.D. Trask, and S. Gard, *Poliomyelitic virus in urban sewage* 1940.



- 644 44. Nakamura, T., et al., *Environmental surveillance of poliovirus in sewage water*  
645 *around the introduction period for inactivated polio vaccine in Japan*. Appl Environ  
646 Microbiol, 2015. **81**(5): p. 1859-64.
- 647 45. Metcalf, T.G., J.L. Melnick, and M.K. Estes, *Environmental virology: from detection*  
648 *of virus in sewage and water by isolation to identification by molecular biology--a*  
649 *trip of over 50 years*. Annu Rev Microbiol, 1995. **49**: p. 461-87.
- 650 46. Tran, H.N., et al., *SARS-CoV-2 coronavirus in water and wastewater: A critical*  
651 *review about presence and concern*. Environ Res, 2021. **193**: p. 110265.
- 652 47. La Rosa, G., et al., *Coronavirus in water environments: Occurrence, persistence and*  
653 *concentration methods - A scoping review*. Water Res, 2020. **179**: p. 115899.
- 654 48. Kitajima, M., et al., *SARS-CoV-2 in wastewater: State of the knowledge and research*  
655 *needs*. Sci Total Environ, 2020. **739**: p. 139076.
- 656 49. Foladori, P., et al., *SARS-CoV-2 from faeces to wastewater treatment: What do we*  
657 *know? A review*. Sci Total Environ, 2020. **743**: p. 140444.
- 658 50. Ahmed, W., et al., *First confirmed detection of SARS-CoV-2 in untreated wastewater*  
659 *in Australia: A proof of concept for the wastewater surveillance of COVID-19 in the*  
660 *community*. Sci Total Environ, 2020. **728**: p. 138764.
- 661 51. Sangkham, S., *A review on detection of SARS-CoV-2 RNA in wastewater in light of*  
662 *the current knowledge of treatment process for removal of viral fragments*. J Environ  
663 Manage, 2021. **299**: p. 113563.
- 664 52. Corpuz, M.V.A., et al., *Viruses in wastewater: occurrence, abundance and detection*  
665 *methods*. Sci Total Environ, 2020. **745**: p. 140910.
- 666 53. Katharina Jahn, D.D., Ivan Topolsky, Anina Kull, Pravin Ganesanandamoorthy,  
667 Xavier Fernandez-Cassi, Carola Bänziger, Alexander J. Devaux, Elyse Stachler, Lea  
668 Caduff, Federica Cariti, Alex Tuñas Corzón, Lara Fuhrmann, Chaoran Chen, Kim  
669 Philipp Jablonski, Sarah Nadeau, Mirjam Feldkamp, Christian Beisel, Catharine  
670 Aquino, Tanja Stadler, Christoph Ort, Tamar Kohn, Timothy R. Julian, Niko  
671 Beerenwinkel, *Detection of SARS-CoV-2 variants in Switzerland by genomic analysis*  
672 *of wastewater samples 2021*.
- 673 54. Cornish, A. and C. Guda, *A Comparison of Variant Calling Pipelines Using Genome*  
674 *in a Bottle as a Reference*. Biomed Res Int, 2015. **2015**: p. 456479.
- 675 55. Bian, X., et al., *Comparing the performance of selected variant callers using synthetic*  
676 *data and genome segmentation*. BMC Bioinformatics, 2018. **19**(1): p. 429.
- 677
- 678

679 **Tables**

680 Table 1 List of synthetic genomes by Twist Bioscience used for the comparison test. Defining  
681 mutation patterns were taken from [https://github.com/phe-genomics/variant\\_definitions](https://github.com/phe-genomics/variant_definitions).

| Twist Part No | GISAID ID       | GISAID Name                       | PANGO lineage  | WHO Label | Defining mutation | Total mutations in Twist genome | SNPs | Indels | MNVs |
|---------------|-----------------|-----------------------------------|----------------|-----------|-------------------|---------------------------------|------|--------|------|
| 103909        | EPI_ISL_601443  | England/MILK9E05B3/2020           | B.1.1.7        | Alpha     | 15                | 28                              | 22   | 4      | 2    |
| 104043        | EPI_ISL_678597  | South Africa/KRISPEC-K005299/2020 | B.1.351        | Beta      | 15                | 25                              | 23   | 2      | 0    |
| 104533        | EPI_ISL_1544014 | India/MH-NCCS P1162000182735/2021 | B.1.617.2      | Delta     | 13                | 37                              | 30   | 7      | 0    |
| 104044        | EPI_ISL_792683  | Japan/IC-0564/2021                | P.1            | Gamma     | 23                | 24                              | 21   | 3      | 0    |
| 105204        | EPI_ISL_6841980 | Hong Kong/HKU-211129-001/2021     | B.1.1.529 BA.1 | Omicron   | 17                | 59                              | 45   | 14     | 0    |
| 105345        | EPI_ISL_7190366 | Australia/QLD2568/202             | B.1.1.529 BA.2 | Omicron   | 20                | 57                              | 48   | 9      | 0    |
| 105346        | EPI_ISL_7718520 | England/MILK-2DF642C/2021         | B.1.1.529 BA.2 | Omicron   | 20                | 58                              | 48   | 9      | 0    |

682

683

684 Table 2 Mixed synthetic samples used to compare the six variant callers. The samples with \*  
685 were also used for comparison of technical replication.

686

| No | Sample mix names          | Synthetic (variant) genomes in the sample | Synthetic genome ratio (%) in the mix |
|----|---------------------------|-------------------------------------------|---------------------------------------|
| 1* | 100_Alpha 0_Beta 0_Delta  | Alpha                                     | 100 / 0 / 0                           |
| 2* | 0_Alpha 100_Beta 0_Delta  | Beta                                      | 0 / 100 / 0                           |
| 3* | 0_Alpha 0_Beta 100_Delta  | Delta                                     | 0 / 0 / 100                           |
| 4  | 25_Alpha 75_Beta 0_Delta  | Alpha / Beta                              | 25 / 75 / 0                           |
| 5  | 50_Alpha 50_Beta 0_Delta  | Alpha / Beta                              | 50 / 50 / 0                           |
| 6  | 75_Alpha 25_Beta 0_Delta  | Alpha / Beta                              | 75 / 25 / 0                           |
| 7  | 95_Alpha 5_Beta 0_Delta   | Alpha / Beta                              | 95 / 5 / 0                            |
| 8  | 10_Alpha 70_Beta 20_Delta | Alpha / Beta / Delta                      | 10 / 70 / 20                          |
| 9  | 20_Alpha 70_Beta 10_Delta | Alpha / Beta / Delta                      | 20 / 70 / 10                          |
| 10 | 25_Alpha 25_Beta 50_Delta | Alpha / Beta / Delta                      | 25 / 25 / 50                          |
| 11 | 25_Alpha 50_Beta 25_Delta | Alpha / Beta / Delta                      | 25 / 50 / 25                          |
| 12 | 50_Alpha 25_Beta 25_Delta | Alpha / Beta / Delta                      | 50 / 25 / 25                          |
| 13 | 50_Alpha 0_Beta 50_Delta  | Alpha / Delta                             | 50 / 0 / 50                           |

|    |                          |               |             |
|----|--------------------------|---------------|-------------|
| 14 | 25_Alpha 0_Beta 75_Delta | Alpha / Delta | 25 / 0 / 75 |
| 15 | 75_Alpha 0_Beta 25_Delta | Alpha / Delta | 75 / 0 / 25 |
| 16 | 0_Alpha 25_Beta 75_Delta | Beta / Delta  | 0 / 25 / 75 |
| 17 | 0_Alpha 5_Beta 95_Delta  | Beta / Delta  | 0 / 5 / 95  |
| 18 | 0_Alpha 50_Beta 50_Delta | Beta / Delta  | 0 / 50 / 50 |
| 19 | 0_Alpha 75_Beta 25_Delta | Beta / Delta  | 0 / 75 / 25 |

687

688 Table 3 List of wastewater samples collected across London between the 15<sup>th</sup> and 18<sup>th</sup>  
 689 December 2021. Samples in bold were also used to generate UpSet plots for Figure 5A-F.

| No        | Wastewater Samples | Sample Code | Sample Collection date | Variants detected by <b>690</b><br><b>691</b> HP |
|-----------|--------------------|-------------|------------------------|--------------------------------------------------|
| 1         | London 1           | S59         | 15/12/2021             | Delta / Omicron <b>692</b>                       |
| <b>2</b>  | <b>London 2</b>    | <b>S42</b>  | 16/12/2021             | Delta / Omicron <b>693</b>                       |
| <b>3</b>  | <b>London 3</b>    | <b>S63</b>  | 16/12/2021             | Delta / Omicron <b>694</b>                       |
| 4         | London 4           | S50         | 16/12/2021             | Delta / Omicron <b>695</b>                       |
| <b>5</b>  | <b>London 5</b>    | <b>S58</b>  | 16/12/2021             | Delta / Omicron <b>696</b>                       |
| <b>6</b>  | <b>London 6</b>    | <b>S43</b>  | 16/12/2021             | Omicron <b>697</b>                               |
| <b>7</b>  | <b>London 7</b>    | <b>S296</b> | 18/12/2021             | Delta <b>698</b>                                 |
| <b>8</b>  | <b>London 8</b>    | <b>S263</b> | 18/12/2021             | Delta / Omicron <b>699</b>                       |
| 9         | London 9           | S302        | 18/12/2021             | Delta / Omicron <b>700</b>                       |
| <b>10</b> | <b>London 10</b>   | <b>S292</b> | 18/12/2021             | Delta / Omicron <b>701</b>                       |
| 11        | London 11          | S278        | 18/12/2021             | Omicron <b>702</b>                               |
| 12        | London 12          | S305        | 18/12/2021             | Omicron / AY.4.2 <b>703</b>                      |
| 13        | London 13          | S270        | 18/12/2021             | Omicron / AY.4.2 <b>704</b>                      |

700

## 701 Figures and Tables legends

702 **Figure 1A-D** Point plots of precision vs recall for synthetic samples, grouped and faceted by  
 703 variant caller, coloured by percentage present in the mix (dark blue, 0%, bright red, 100%). A  
 704 linear regression for each plot is also present. A. is comparing the synthetic samples to the  
 705 alpha variant reference, B. Beta variant reference, C. for Delta variant reference and D. for  
 706 Gamma variant reference. As there was no mixed ratio for the Gamma variant which we have  
 707 used as a negative control, no gradient was applied. Except for LoFreq and iVar, all the  
 708 callers show a high precision and recall, and this is proportional to the percentage of the  
 709 variant in the mix: indeed, samples with a high percentage of a variant (e.g., close to 100%, in  
 710 red) tend to have a higher precision and recall, compared to those samples that have a lower  
 711 percentage of the variant being plotted (e.g., closer to 0%, in blue) .

712

713 **Figure 2A-B** Point plots of precision vs recall for wastewater samples for the Delta  
 714 variant, faceted by variant caller. A. Comparison of real wastewater samples to the Delta  
 715 variant reference and B. with labelled samples to better identify which samples had low recall  
 716 and low precisions (thus, not containing any Delta variant). As shown in Figure 4C, some

717 samples such as S296 and S50 are those containing a Delta variant in the mix, compared to  
718 S43 seen to be negative for all the variant callers. As shown previously for the synthetic  
719 data, LoFreq has the lowest recall and precision.

720

721 **Figure 3A-C** Point plots of precision vs recall for real wastewater samples for the three  
722 Omicron variants, faceted by variant caller. A. Omicron England variant reference; B.  
723 Omicron Hong Kong variant reference; C. Omicron Australia variant reference. Since the  
724 wastewater samples are known to contain the Omicron variant, samples do show a higher  
725 precision and recall compared to the negative controls used to generate Figure 4A-B-  
726 D. Samples S63, S58, S42 and S292 had the highest precision and  
727 recall for BCFtools, Freebayes, GATK, iVar and VarScan, while LoFreq did not call with the  
728 same efficiency. S50 and S296 had the lowest precision and recall for all the callers. Notably,  
729 GATK did not call S296.

730

731 **Figure 4A-F** Upset plots showing the common set of mutation found in (A) Alpha reference  
732 genome and sample containing 100% alpha synthetic genome (B) Beta reference genome and  
733 sample containing 100% beta synthetic genome (C) Delta reference genome and sample  
734 containing 100% delta synthetic genome. (D-F) Upset plots showing common mutation  
735 between sample mix (50% Alpha, 25% Beta and 25% Delta synthetic genome) and (D) Alpha  
736 reference genome (E) Beta reference genome and (F) Delta reference genome for 6 different  
737 variant callers. A= Alpha; B= Beta; C= Delta; D= mixed sample 12 Alpha; E= mixed  
738 sample 12 Beta; F= mixed sample 12 Delta. For each A-F plot we added the variant being  
739 tested at the top of the variant callers. Each mutation called by variant callers below Alpha,  
740 Beta and Delta can then be compared to look at how many of the variant-defining mutations  
741 are found by the variant caller. The Figures show that not all the defining mutations are found  
742 by each of the caller and the additional mutations each variant caller has found. Among all  
743 the callers, LoFreq is the caller with the highest number of mutations detected and much  
744 fewer corresponding to the variant-defining list as shown by the variant on top of the callers.

745

746 **Figure 5A-F** Upset plots of wastewater samples showing the common set of  
747 defining mutations found between Delta, Omicron BA.1 and Omicron BA.2 and wastewater  
748 samples (A) S42 (B) S58 (C) S63 (D) S292 (E) 296 and (F) S263 for 6 different  
749 variant callers. A=S42, B=S58, C=S63, D=S292, E=S296 – GATK failed, F=S263. As  
750 described for Figure 4A-F, each mutation called by variant callers listed below Omicron  
751 BA.1, Omicron BA.2 and Delta can then be compared to look at how many of the variant-  
752 defining mutations are found by the variant caller. The Figure show that not all the defining  
753 mutations are found by each of the caller and the additional mutations each variant caller has  
754 found. As seen in the synthetic samples, LoFreq is the caller with the highest number of  
755 mutations detected and much fewer corresponding to the variant-defining list as shown by the  
756 variant on top of the callers. All callers also show the presence of unique mutations not found  
757 by the other callers and not present in the list of the defining ones as seen under Omicron  
758 BA.1, Omicron BA.2 and Delta.

759

760 **Figure 6A-F** Alternate allele frequencies of the defining mutations for Alpha (A), Beta (B)  
761 and Delta (C) variants were plotted for the 19 selected synthetic datasets for six different  
762 variant callers. Similarly, the alternate allele frequencies of the defining mutations of  
763 Omicron BA.1 (D), Omicron BA.2 (E) and Delta (F) were plotted for 13 wastewater samples  
764 for six different variant callers. The data points were coloured based on the 4-color rainbow  
765 gradient from red (0%) to purple (100%). Degenerate codons were not plotted.

766

767 **Supplementary Figure 1A-D** Point plots of precision vs recall for synthetic samples,  
768 grouped and coloured by variant caller and a linear regression for each. A, Alpha variant  
769 reference, B. Beta variant reference, C. Delta variant reference and D. Gamma variant  
770 reference. The figure shows the low precision recorded by LoFreq compared to the rest of the  
771 variant callers while is higher for VarScan, FreeBayes, BCFtools and GATK. Interestingly,  
772 trend lines overlap for Freebayes and BCFtools.

773

774 **Supplementary Figure 2** Plot of F1 score vs callers for three synthetic samples (1) 100%  
775 alpha (2) 100% Beta and (3) 100% Delta as listed in Table 2 (samples with \*). Each plot  
776 represents caller in relation to either the precision or the recall, expressed as the F1 score. The  
777 figure shows that all the replicates (filled circle) have similar recall and precision, suggesting  
778 that no major differences are observed. As shown in Figure 1 and 2, LoFreq shows the lowest  
779 F1 score compared to the rest of the callers, followed by iVar. FreeBayes and VarScan,  
780 showed similar results, while GATK had the highest F1 score, followed by BCFtools.

781

782 **Supplementary Figure 3A-D** Point plots of precision vs recall for wastewater samples,  
783 coloured by variant caller. A, Alpha variant reference, B. Beta variant reference, C. Delta  
784 variant reference and D. Gamma variant reference. The figure shows that variants not found  
785 in the mix such as Alpha, Beta and Gamma have low precision and recall. Some of the  
786 samples are known to be positive for the Delta variant therefore the latter will have a  
787 higher precision and/or recall.

788

789 **Supplementary Figure 4A-C** Point plots of precision vs recall for wastewater samples for  
790 the Omicron variant, grouped and coloured by variant caller and a linear regression for each.  
791 A, Omicron England variant reference, B. Omicron Hong Kong variant reference, C.  
792 Omicron Australia variant reference. Since the wastewater samples are known to contain the  
793 Omicron variant, samples do show a higher precision and recall compared to the negative  
794 controls used to generate Figure 4 A-B-D.

795

796 **Supplementary Figure 5A-F** SNPs, Indels, MNVs bar plots for synthetic and  
797 real wastewater samples.

798 A. Number of SNPs calculated for each of the 19 synthetic samples (mean of replicates). The  
799 figure clearly identifies LoFreq as the caller with the highest number of SNPs detected, while

800 the rest of the callers do show a similar pattern. Detailed differences excluding LoFreq can be  
801 appreciated in Supplementary Figure 2A-B.

802 B. Number of SNPs calculated for each of the 13 wastewater samples with variable results  
803 among the callers. In comparison to other callers, LoFreq still calls more SNPs than expected  
804 in some of the samples, namely S296, S292, S42, S50.

805 C. Number of Indels calculated for each of the 19 synthetic samples (mean of replicates). As  
806 seen for the SNPs bar plots, LoFreq calls the highest number of Indels detected, while the rest  
807 of the callers do show a similar pattern. Detailed differences excluding LoFreq can be  
808 appreciated in Supplementary Figure 2C-D.

809 D. Number of Indels calculated for each of the 13 wastewater samples with variable results  
810 among the callers. In comparison to other callers, LoFreq still calls more Indels than expected  
811 in some of the samples, namely S296, S292, S305, S42, S50, S58 and S63. Notably, we were  
812 not able to verify the presence of Indels for GATK for sample S296.

813 E. Number of MNPs calculated for each of the 19 synthetic samples (mean of replicates).  
814 Only Freebayes and iVAR had detectable values to be plotted, while the rest of the callers did  
815 not call this type of base variation.

816 F. Number of MNPs calculated for each of the 13 wastewater samples. As seen for the  
817 synthetic samples, only Freebayes and iVAR detected the presence of MNPs.

818

819 **Supplementary Figure 6A-F** SNPs, Indels, MNVs bar plots for synthetic and  
820 real wastewater samples without plotting LoFreq values. A. Number of SNPs calculated for  
821 each of the 19 synthetic samples (mean of replicates). B. Number of SNPs calculated for each  
822 of the 13 wastewater samples. C. Number of Indels calculated for each of the 19 synthetic  
823 samples (mean of replicates). D. Number of Indels calculated for each of the 13 wastewater  
824 samples. E. Number of MNPs calculated for each of the 19 synthetic samples (mean  
825 of replicates). F. Number of MNPs calculated for each of the 13 wastewater samples.

826

827 **Supplementary Figure 7A-C** Statistical analysis of recall, precision and F1 score across the  
828 six variant callers for synthetic and wastewater samples. The figure shows boxplots showing  
829 variant caller scores for wastewater samples. For each figure, Top: Precision. Middle: Recall.  
830 Bottom: F1 Score. A. Boxplots showing variant caller scores for synthetic samples. Right:  
831 Post-hoc Dunn's test p-values, highlighted where  $p < 0.05$  indicating significant difference  
832 between the distribution of scores of that caller with another. LoFreq is stochastically  
833 dominated by the others when evaluating precision and F1 scores. iVar is stochastically  
834 dominant for recall. B. Left: Boxplots showing variant caller scores for wastewater samples.  
835 Right: Post-hoc Dunn's test p-values, highlighted where  $p < 0.05$  indicating significant  
836 difference between the distribution of scores of that caller with another. LoFreq is  
837 stochastically dominated by the others when evaluating precision and F1 scores. iVar is  
838 stochastically dominant for recall but is dominated by all callers except LoFreq for precision.  
839 C. Left: Boxplots showing variant caller scores for synthetic and wastewater samples  
840 combined. Right: Post-hoc Dunn's test p-values, highlighted where  $p < 0.05$  indicating  
841 significant difference between the distribution of scores of that caller with another. LoFreq is

842 stochastically dominated by the others when evaluating precision and F1 scores. iVar is  
843 stochastically dominant for recall but is dominated by all callers except LoFreq for precision.  
844

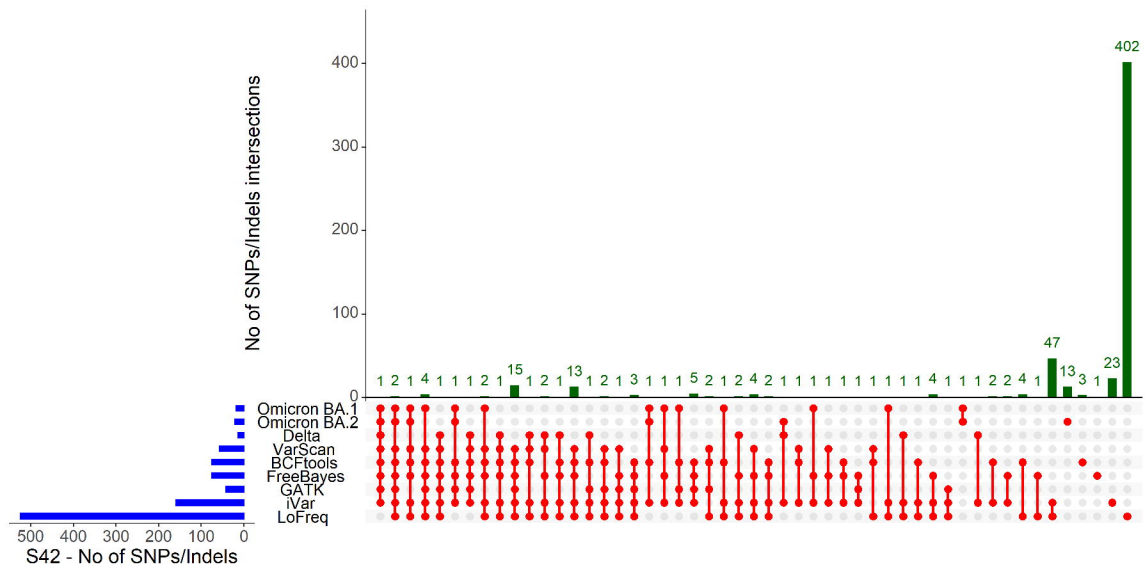





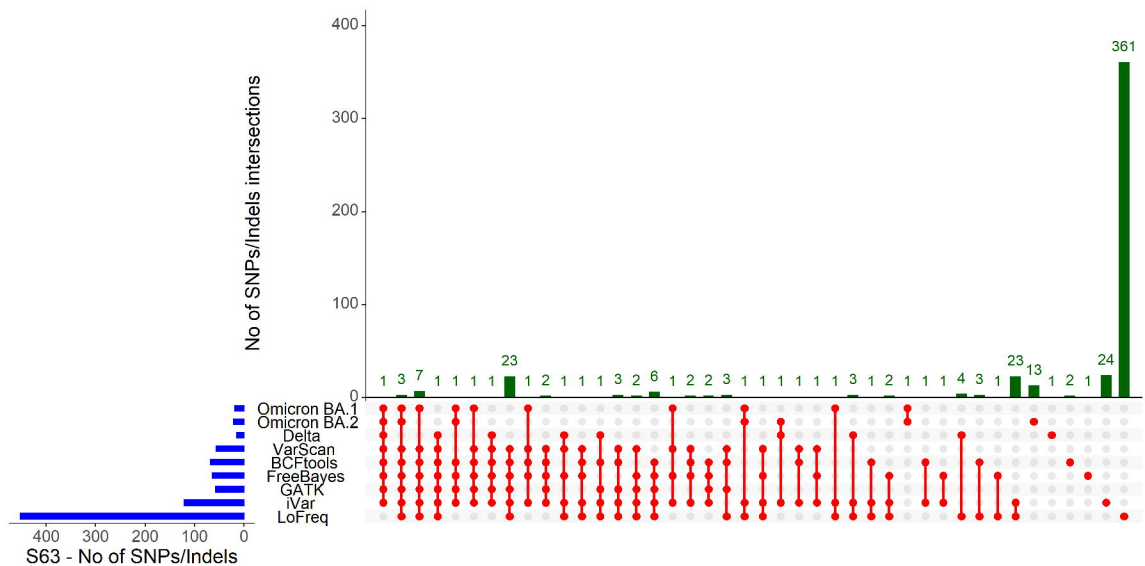

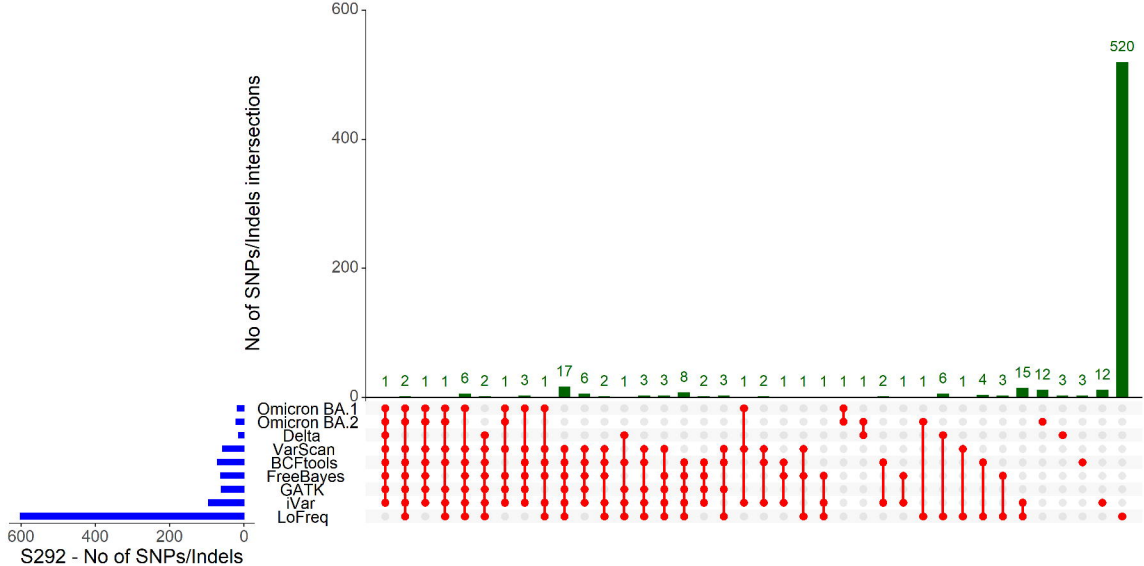

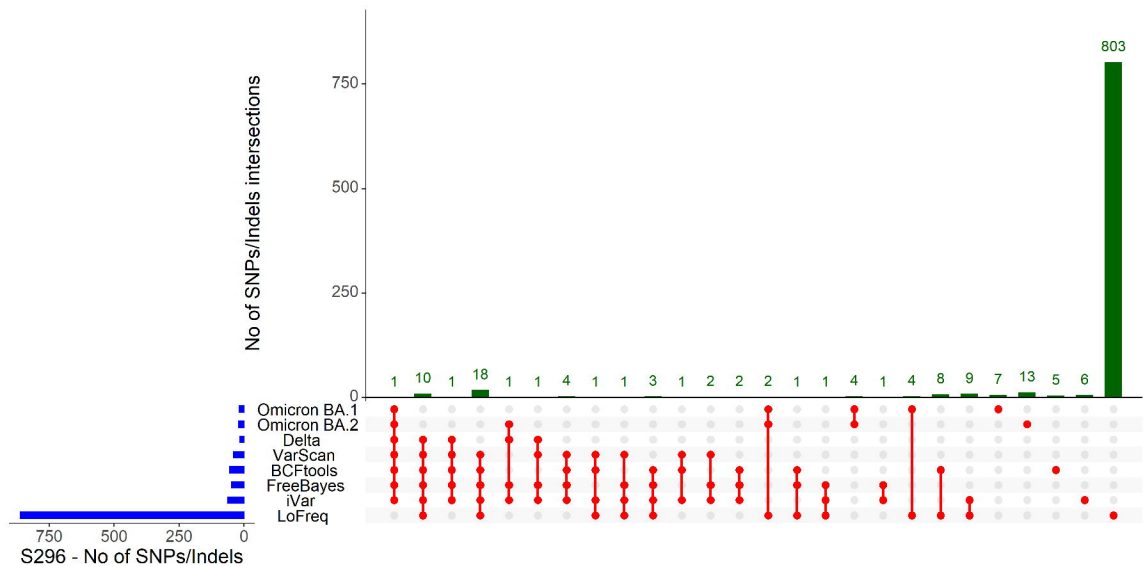

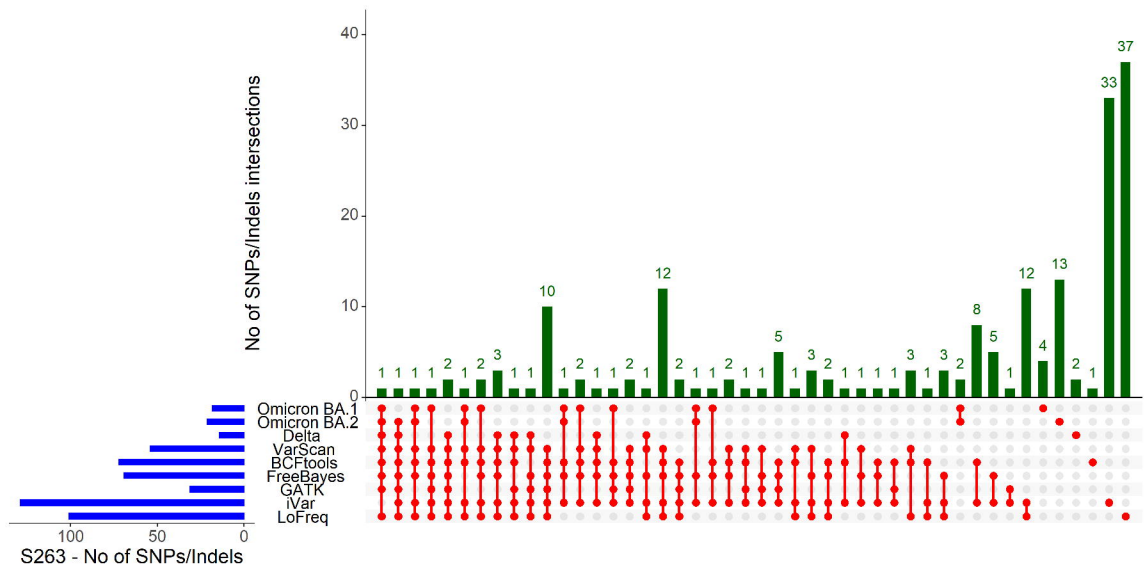

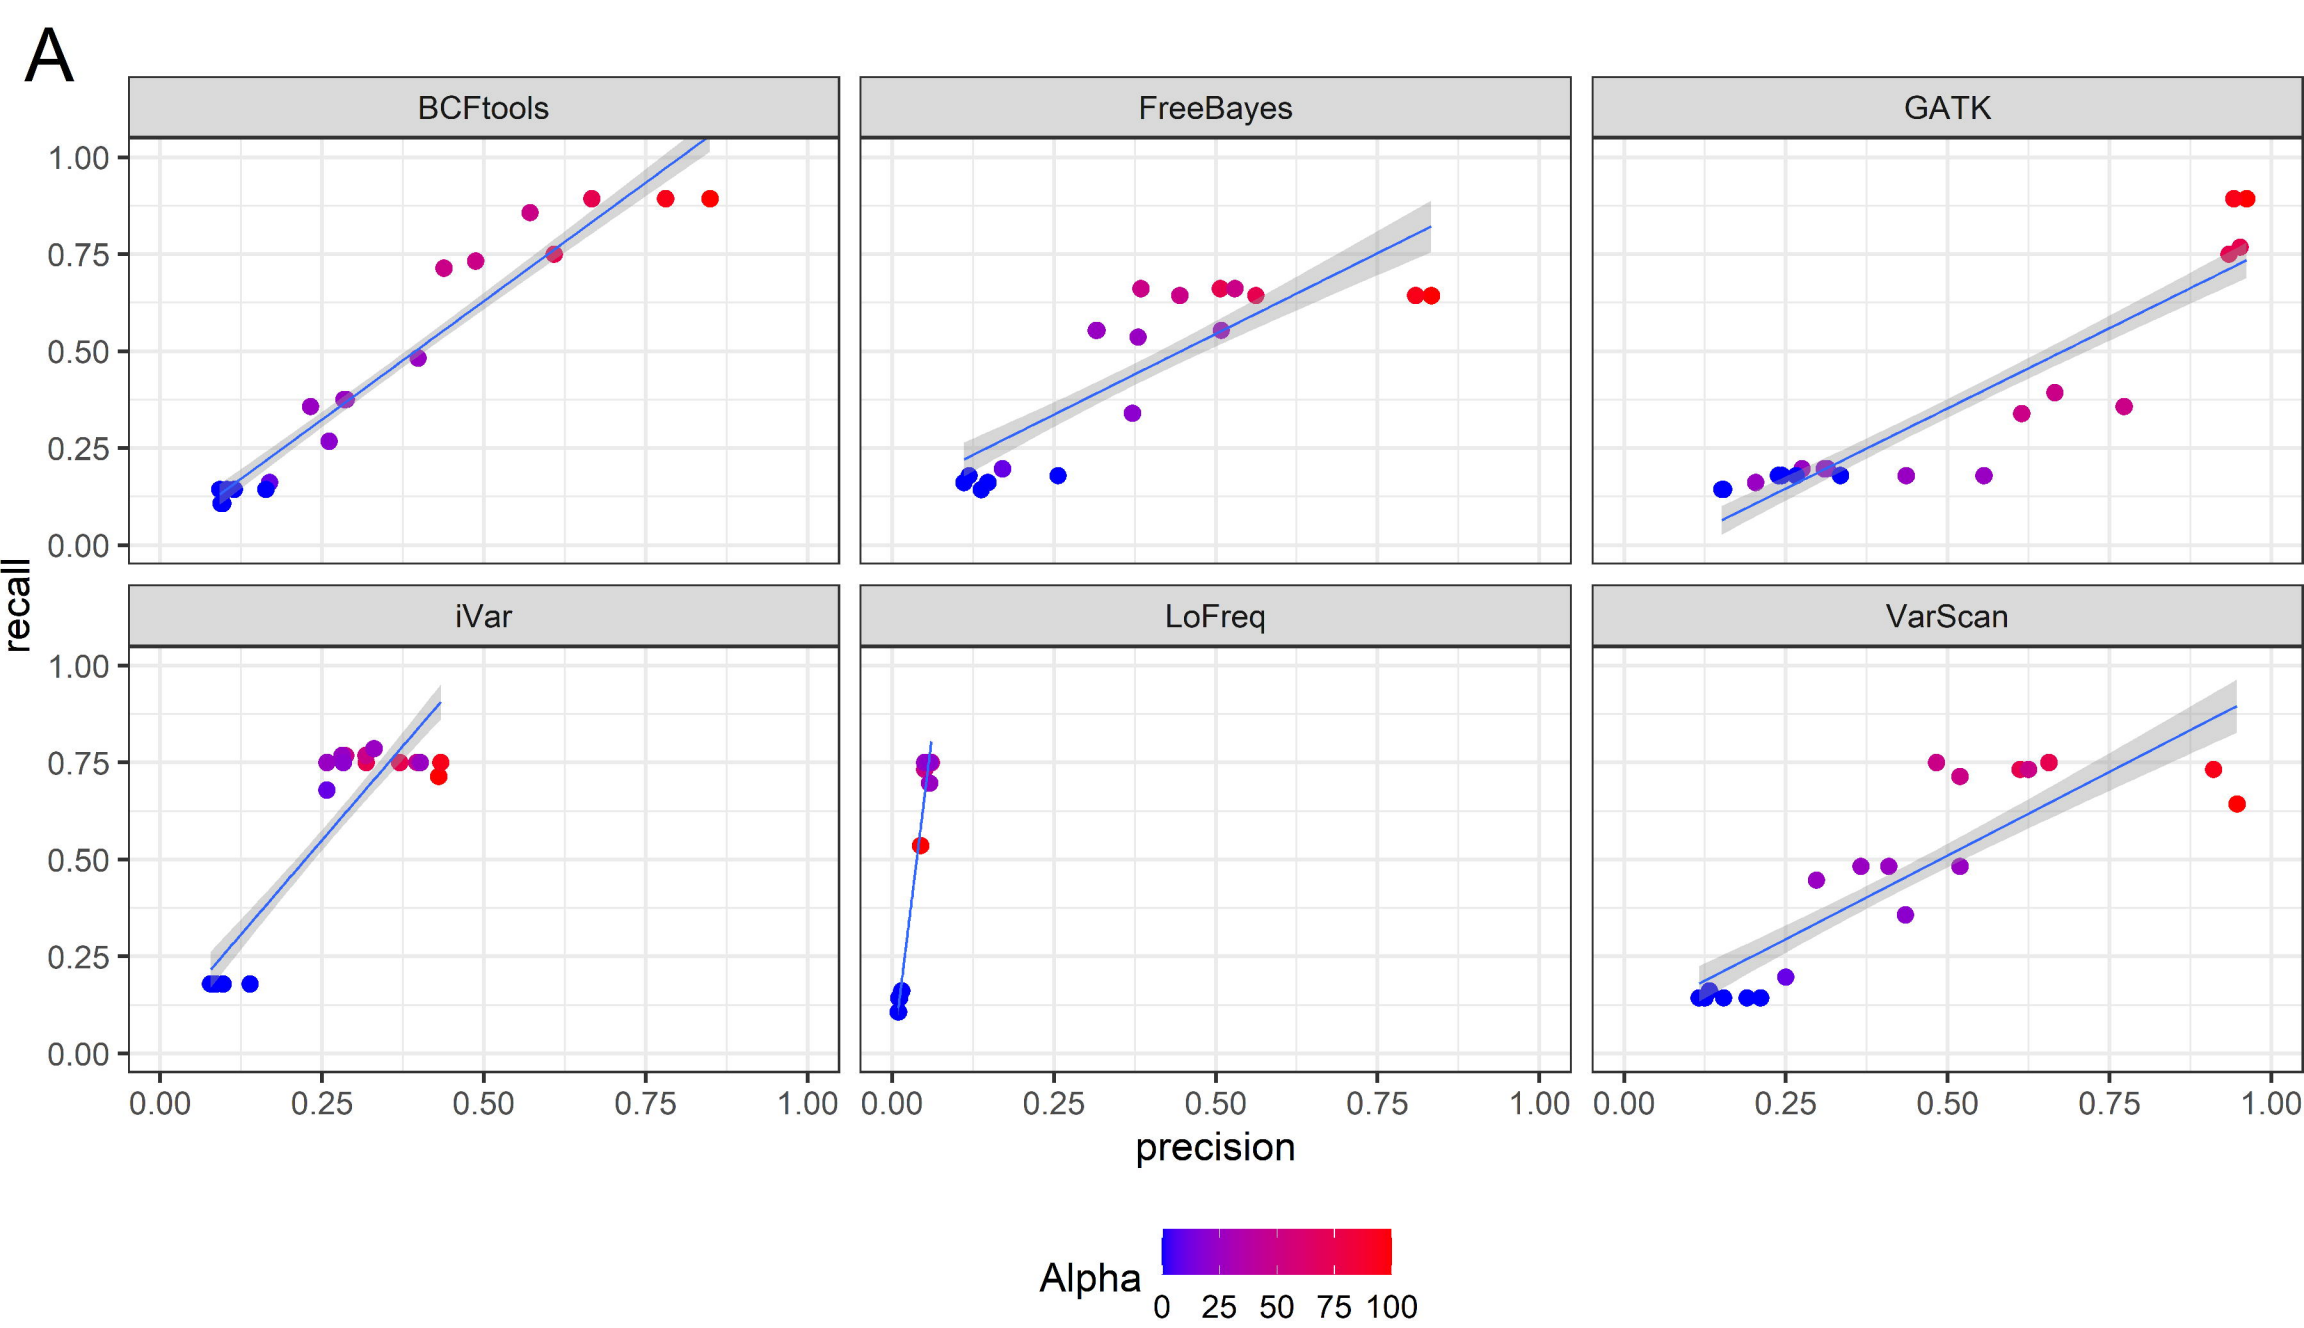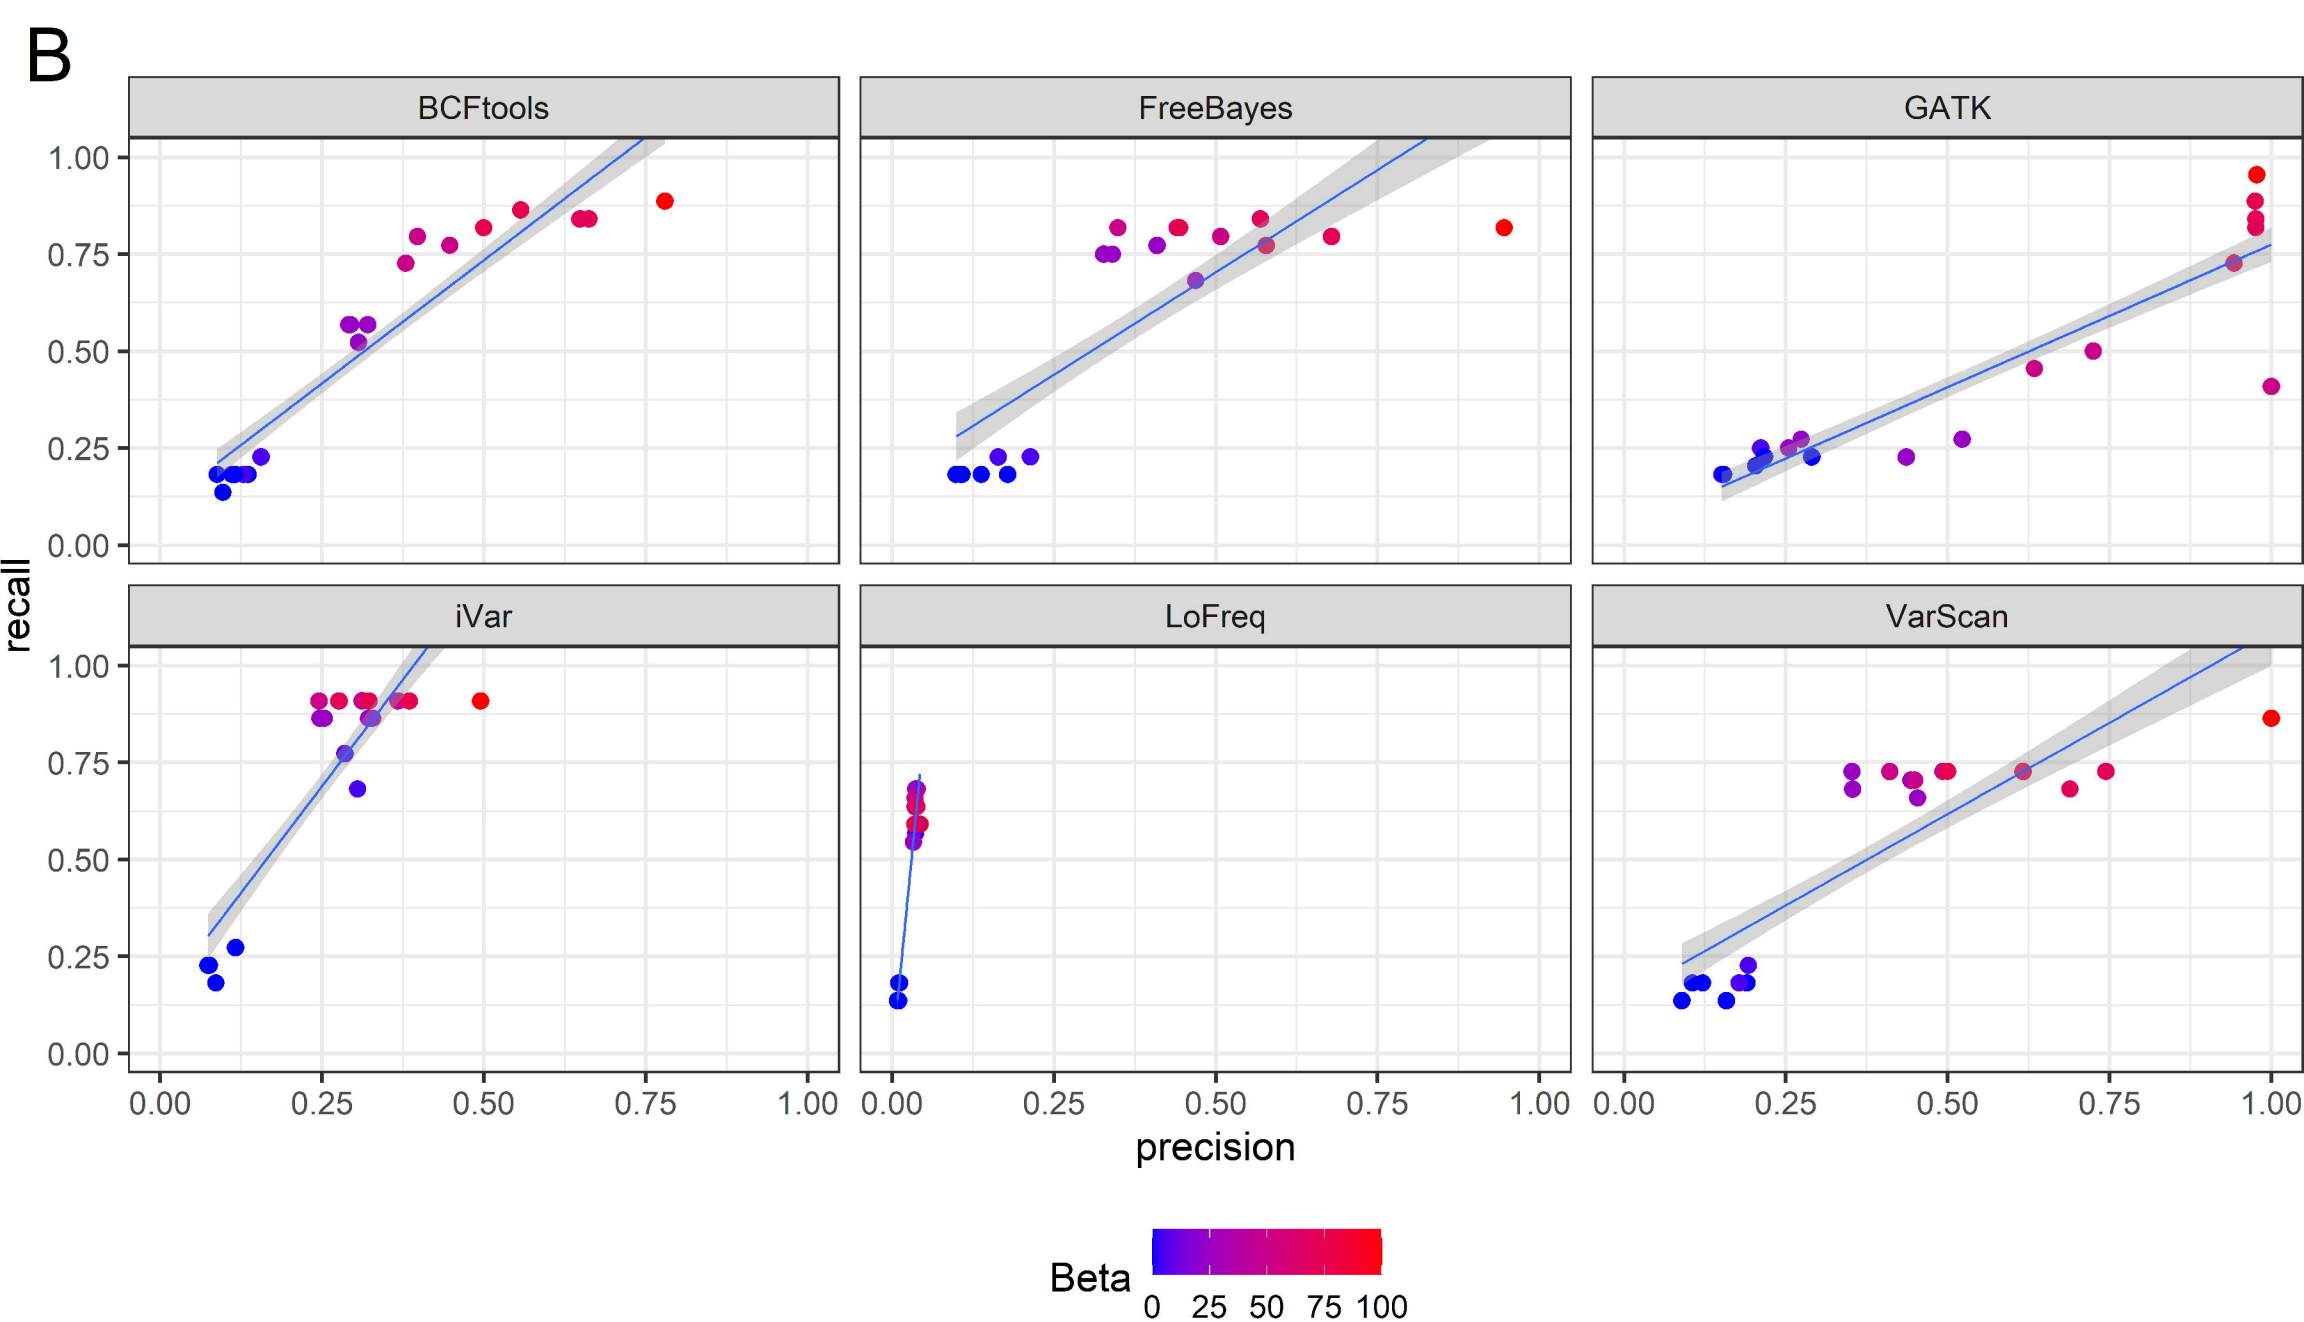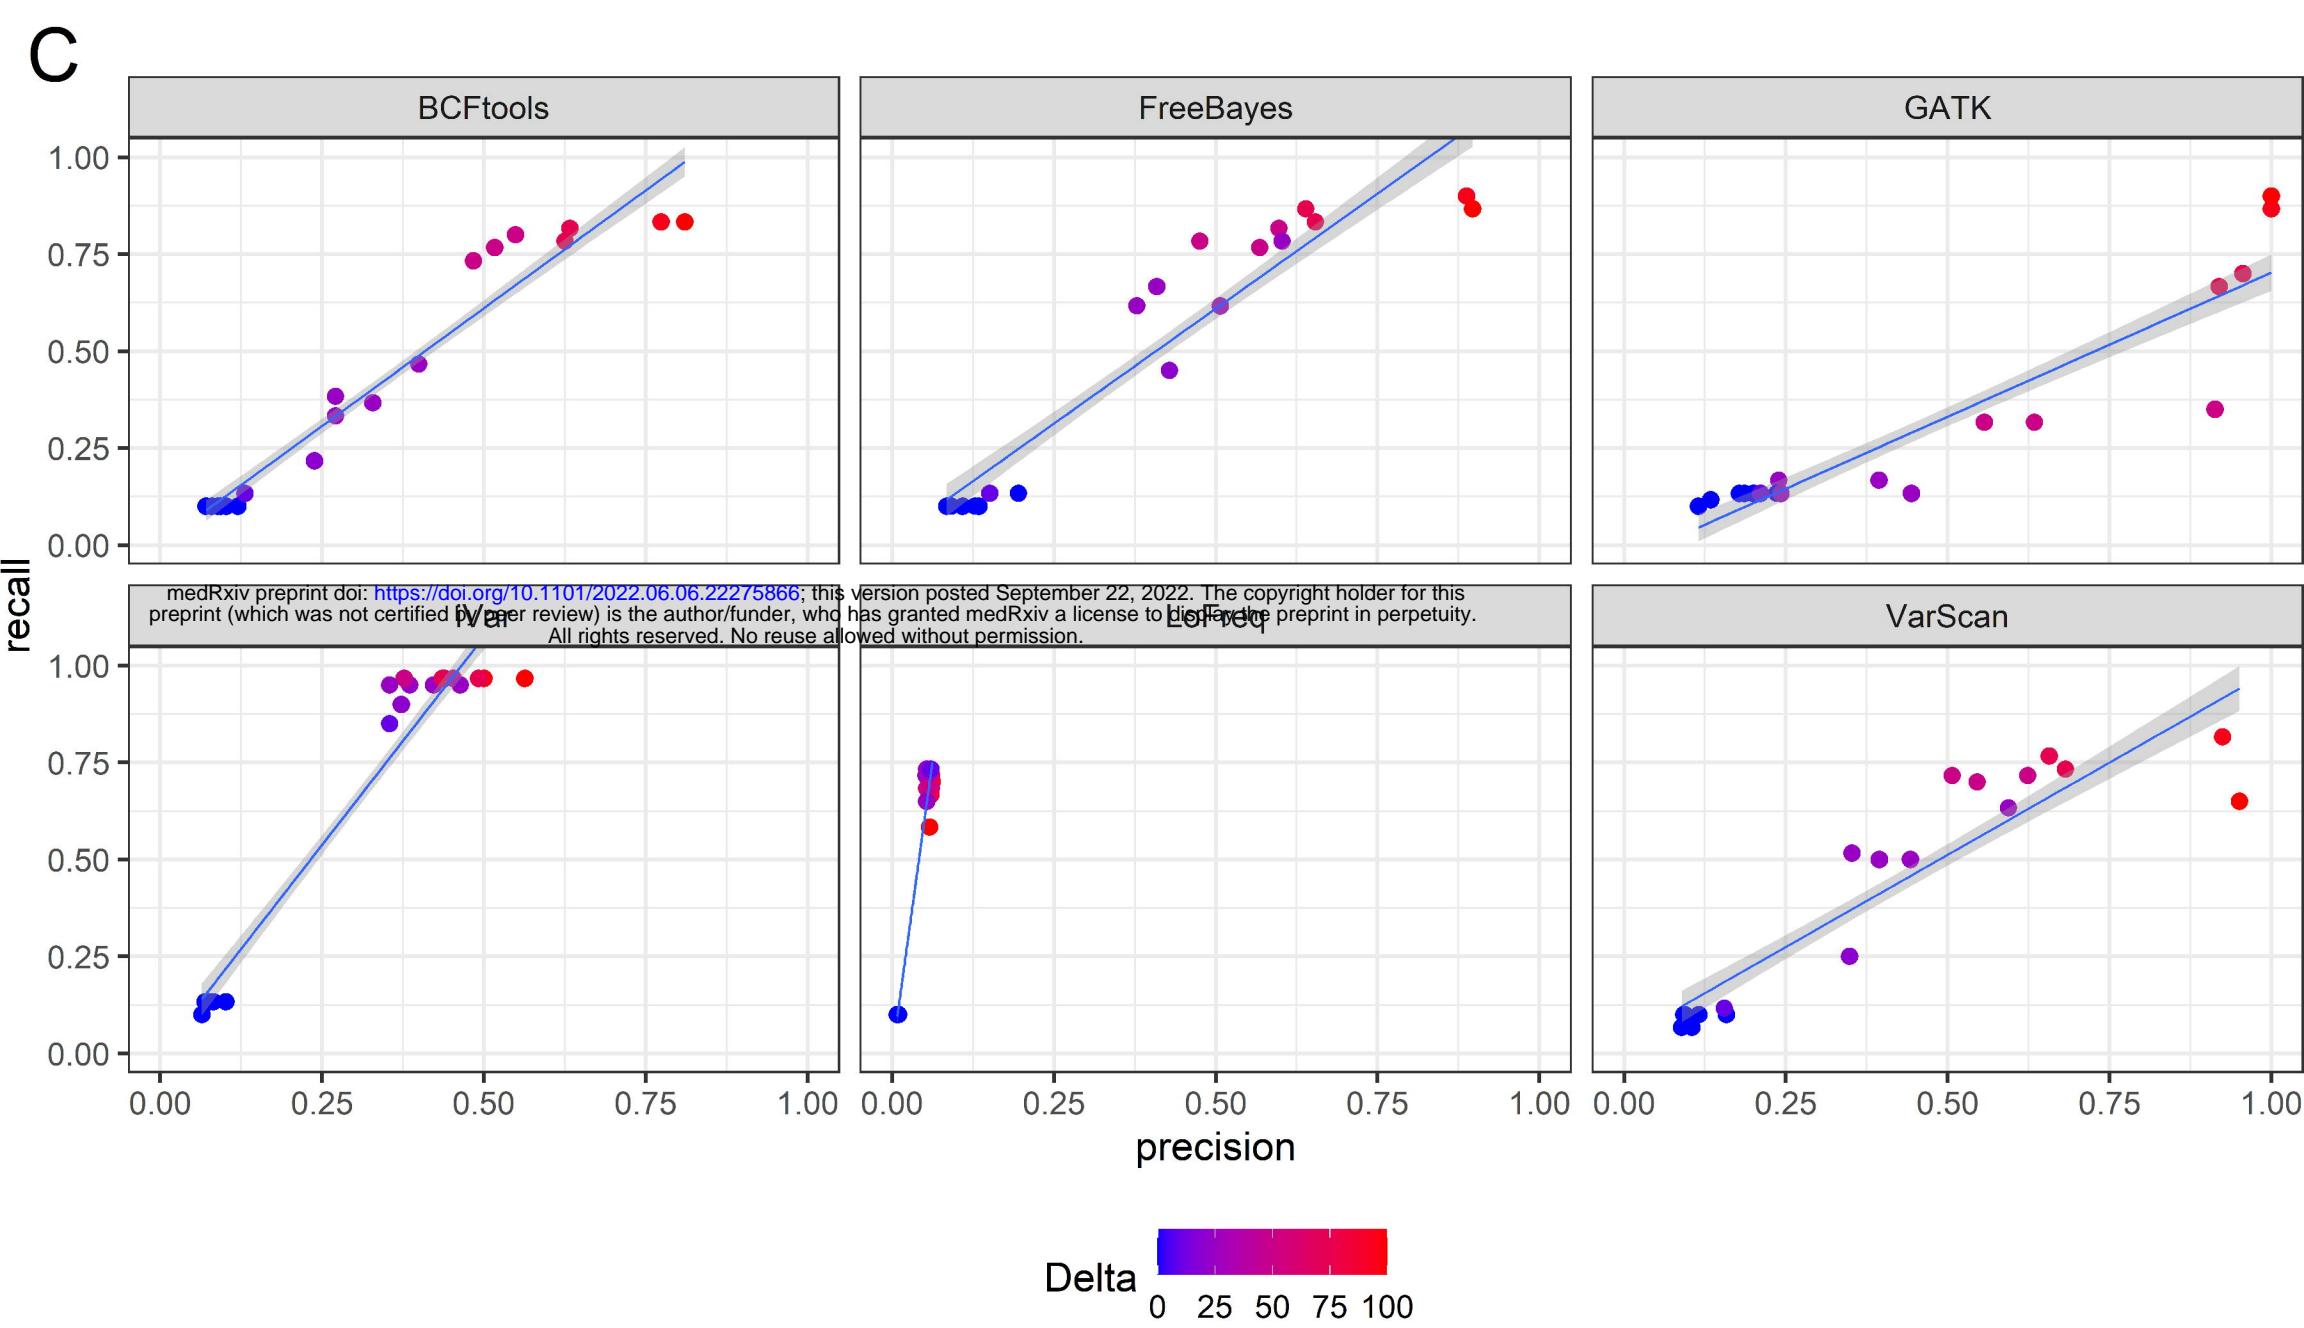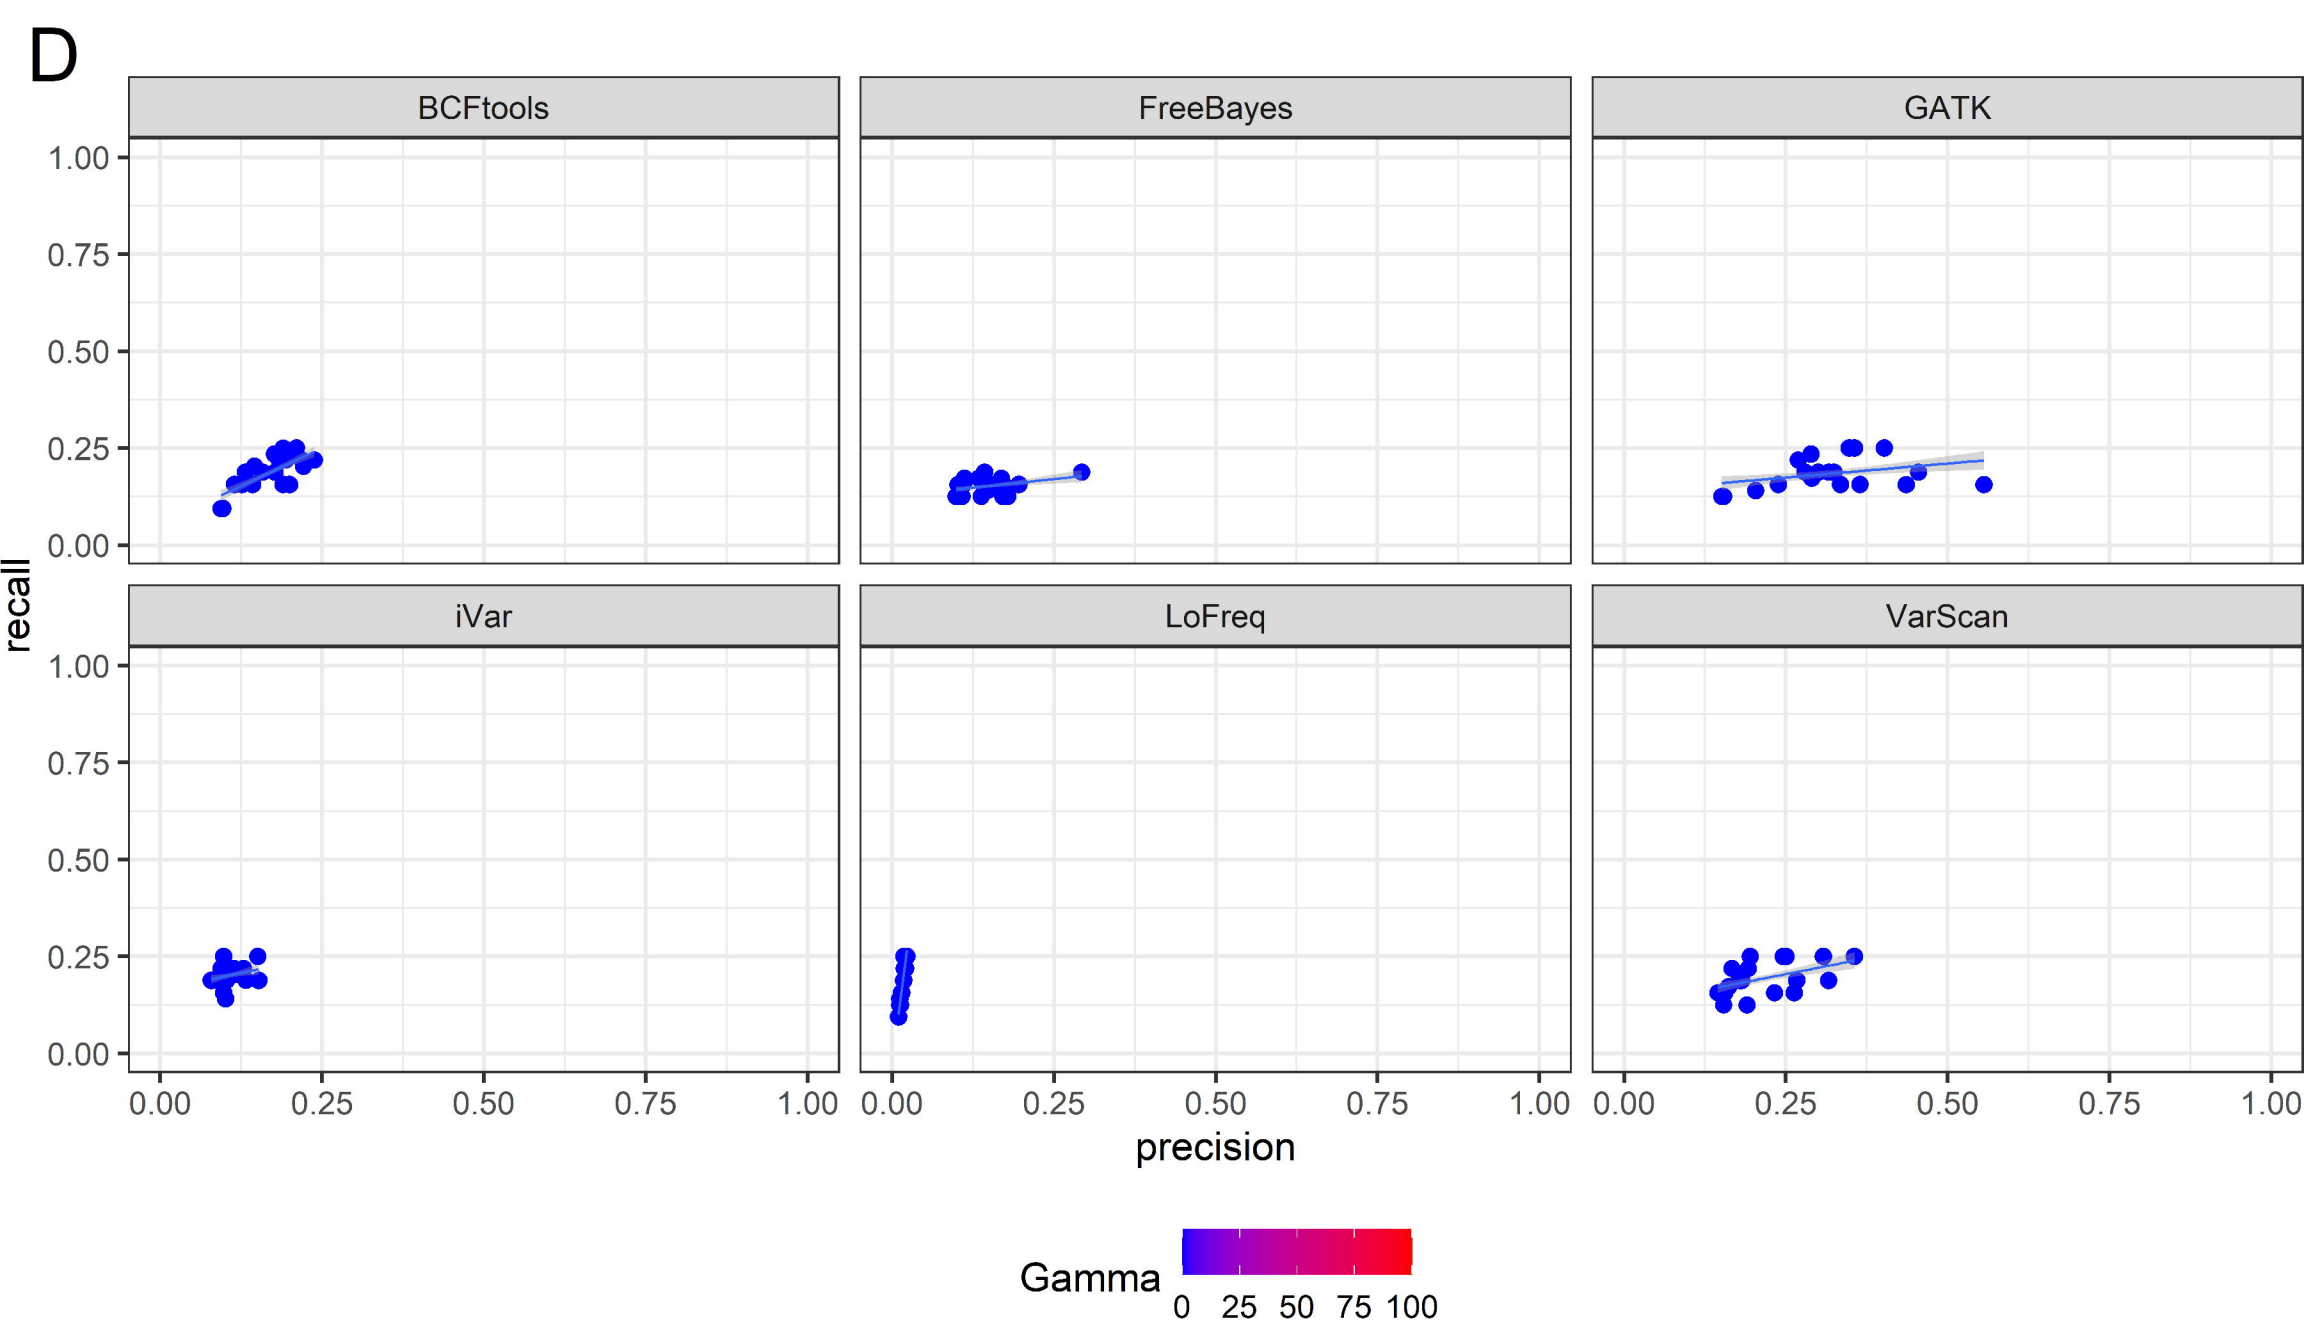



**A**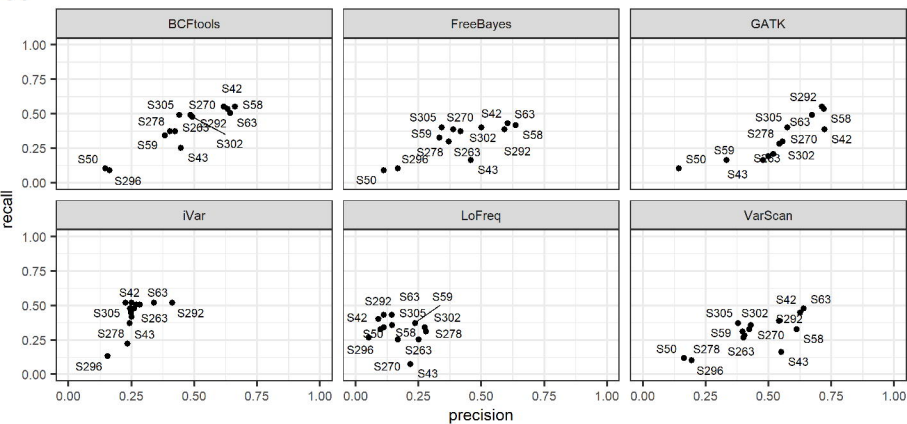**B**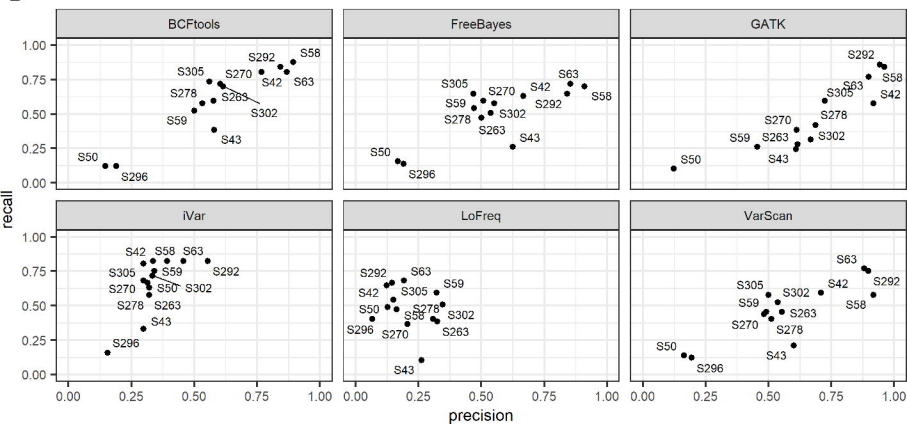**C**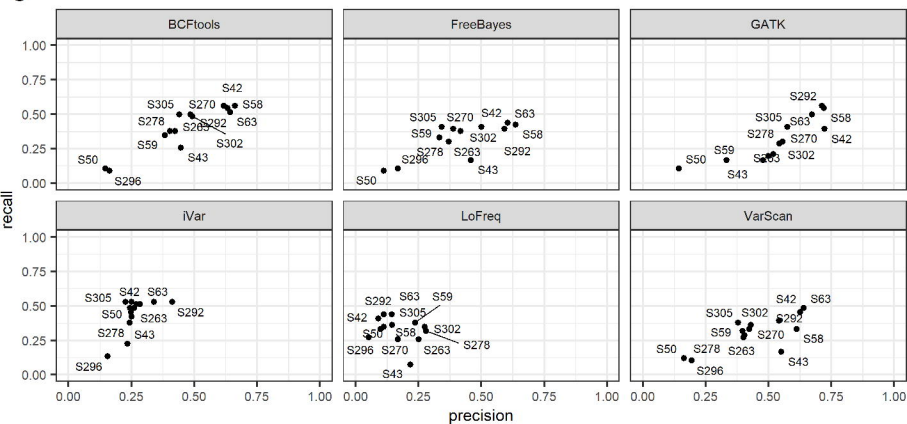



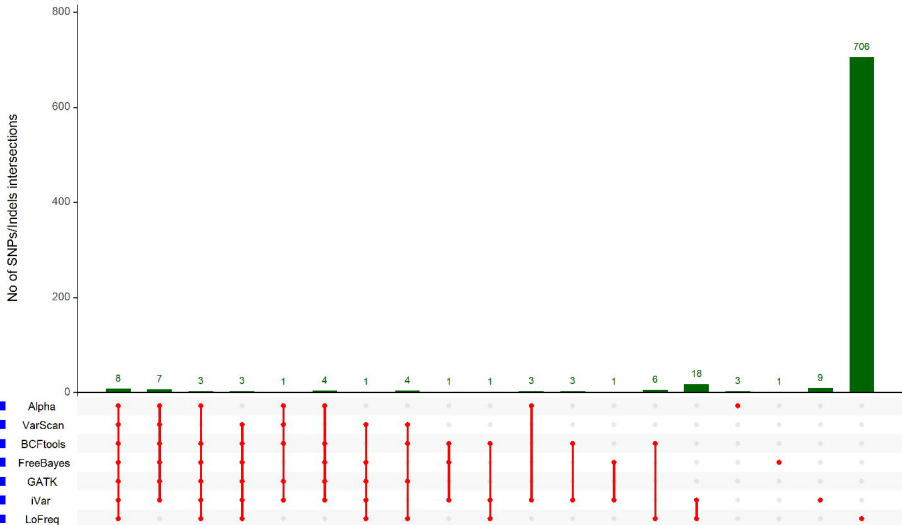

100% Alpha - No of SNPs/Indels

- Alpha
- VarScan
- BCFtools
- FreeBayes
- GATK
- IVar
- LoFreq



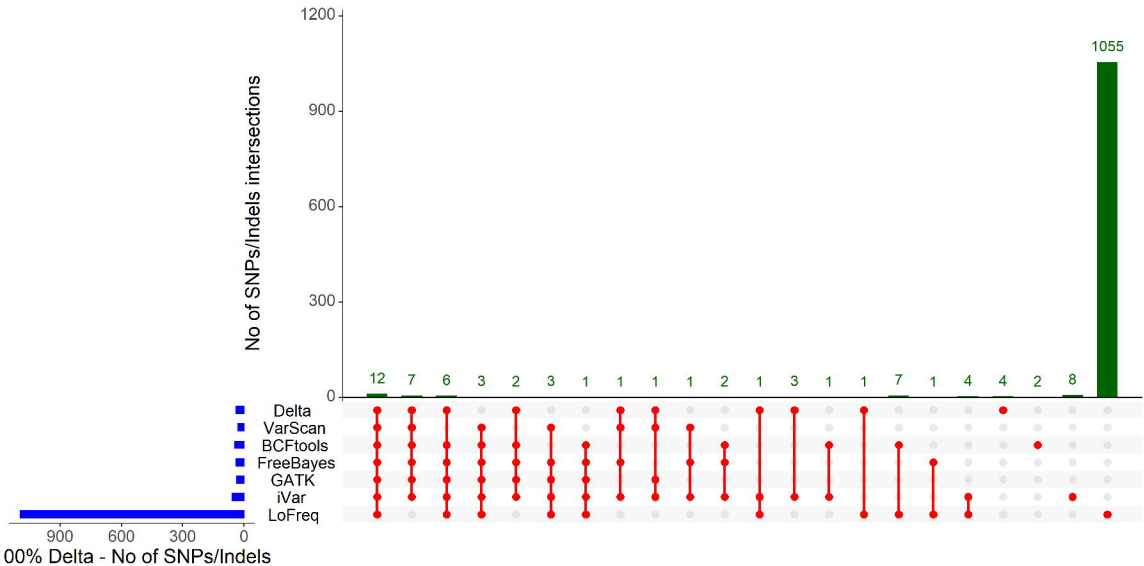





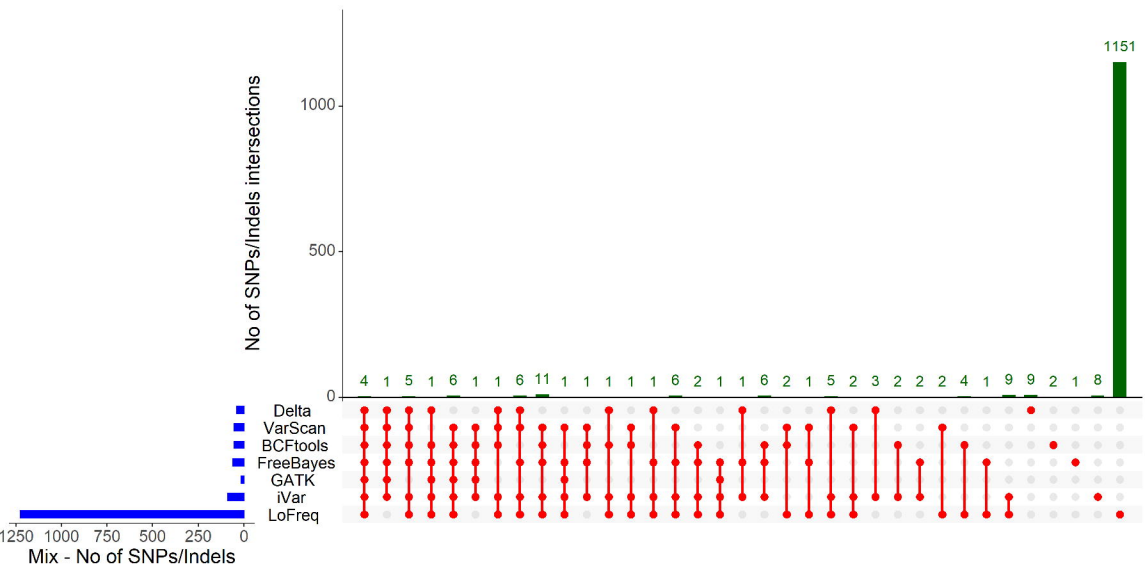

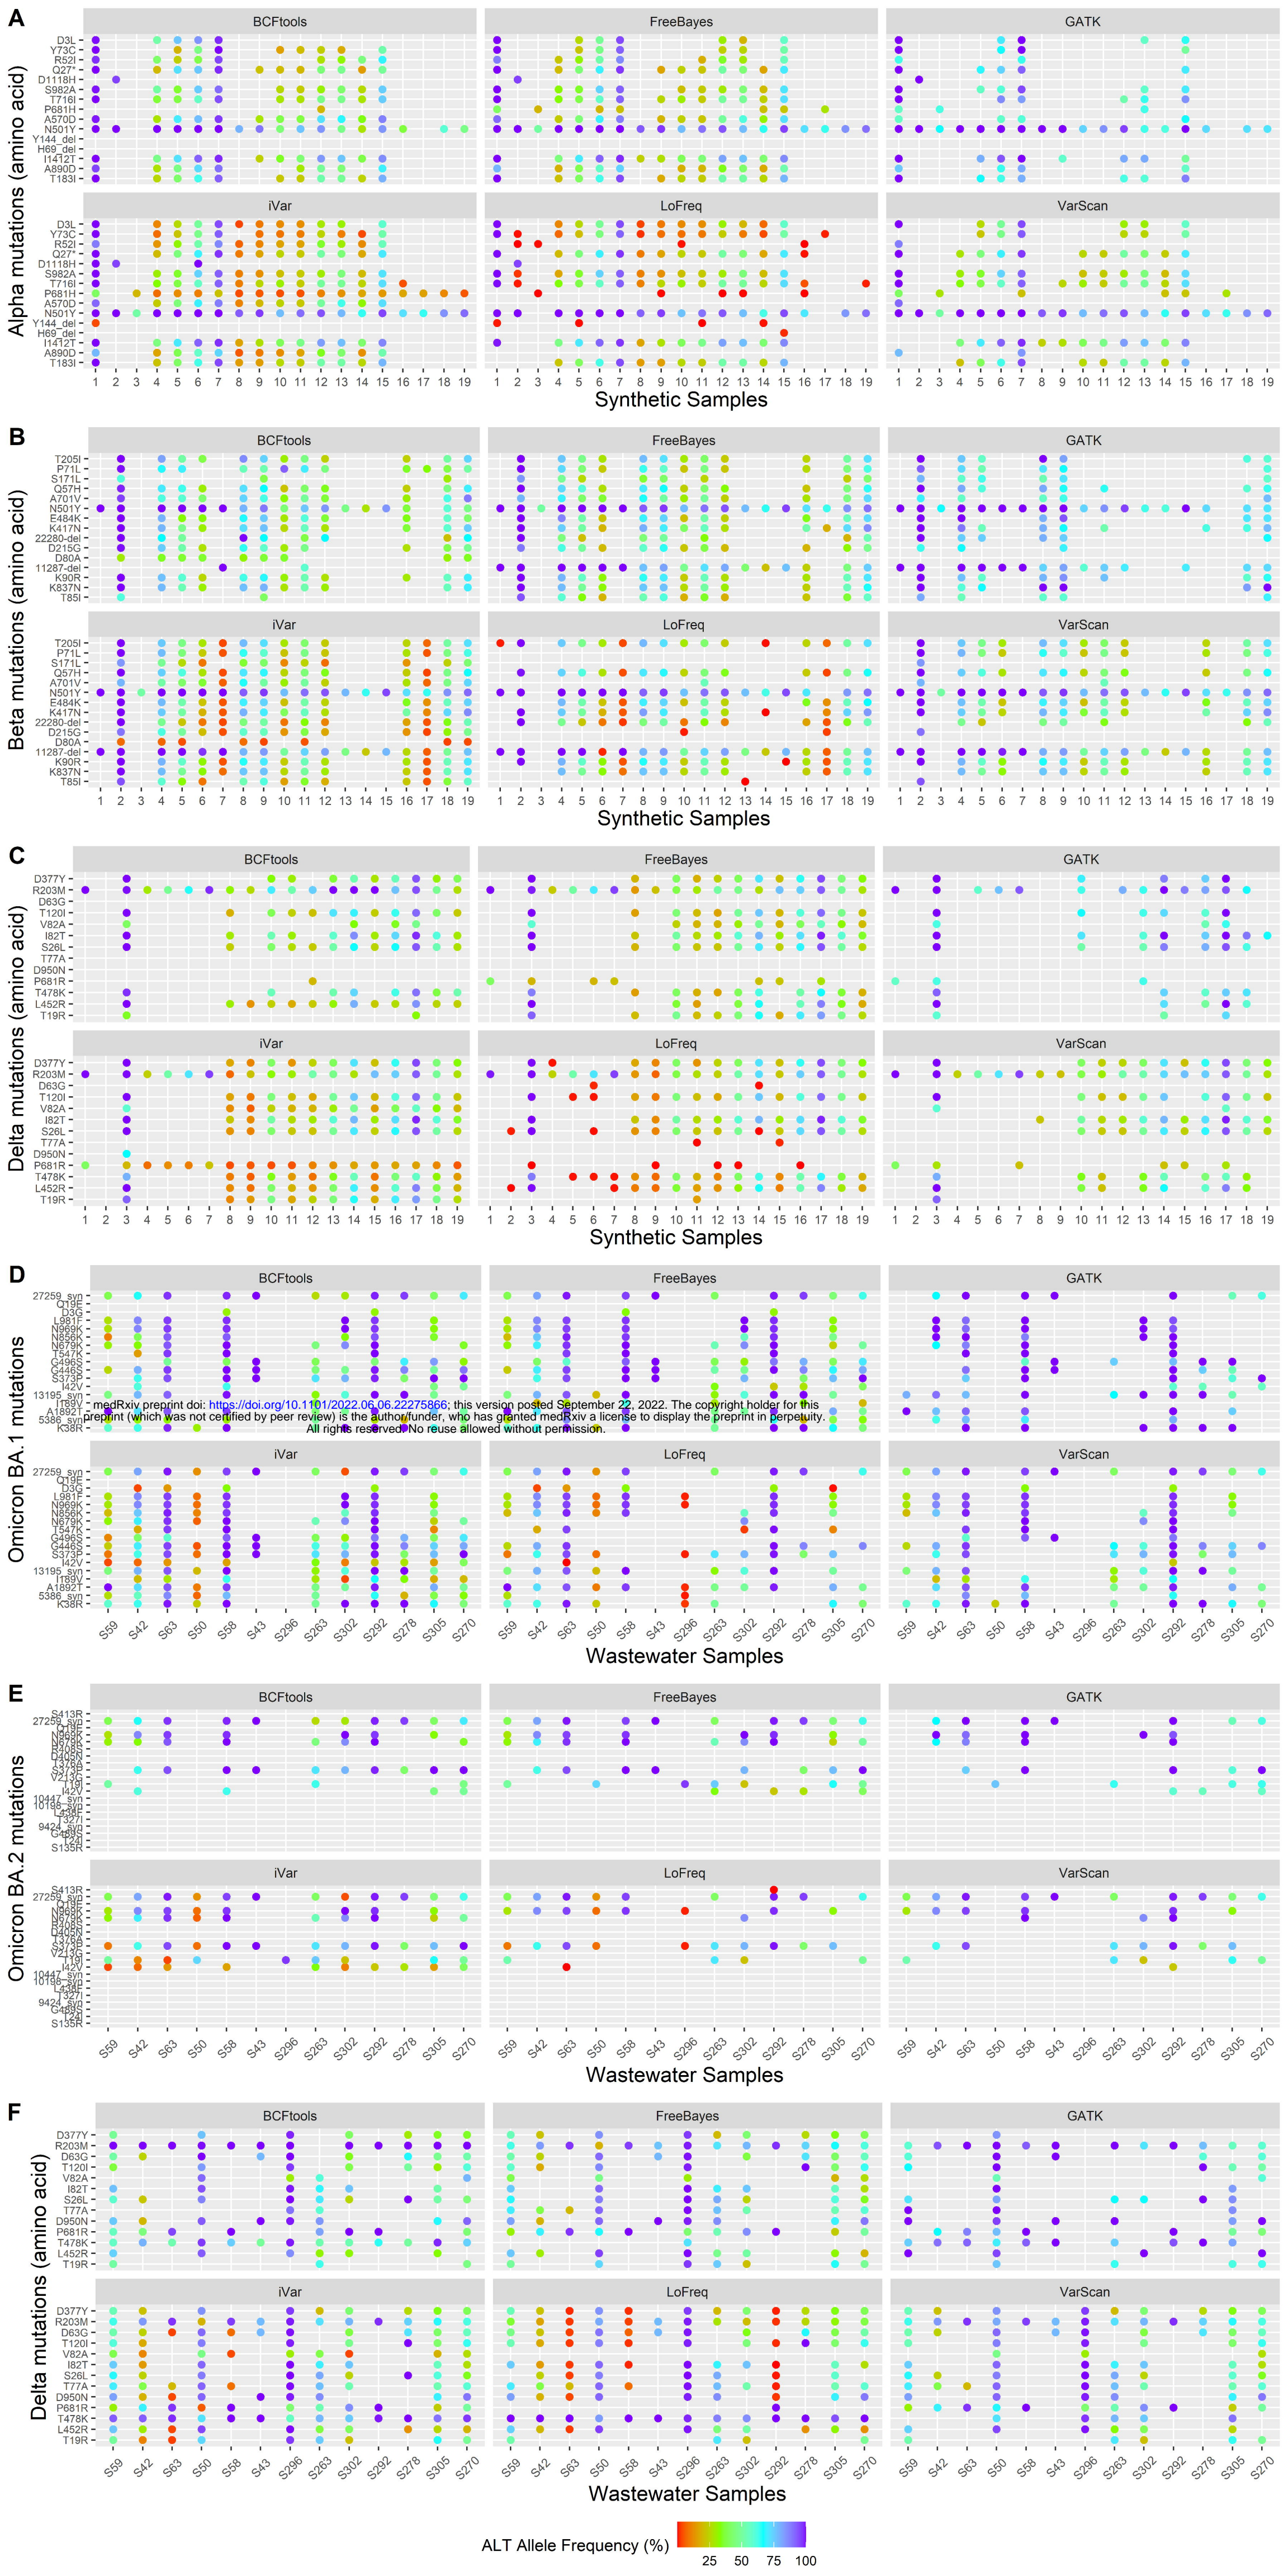

Source: https://medrxiv.org/content/10.1101/2022.06.06.22275866v2.full.pdf
