# Supplementary material for: Evaluation of variant calling algorithms for wastewater-based epidemiology using mixed populations of SARS-CoV-2 variants in synthetic and wastewater samples
Source: bioRxiv or medRxiv preprint supplement (doi:10.1101/2022.06.06.22275866), 2022-09-22
Supplement: Supplementary file [file media-1.pdf]

## Supplementary Information – commands and parameters used

### **Commands**

#### **Index the sorted bam file:**

```
samtools index sample1.sorted.bam
```

#### **bcftools:**

```
bcftools mpileup -Ou -f ref.fa sample1.sorted.bam | bcftools call -mv -Ob -o sample1.bcf
```

```
bcftools convert -O v -o sample1.vcf sample1.bcf
```

#### **Freebayes:**

```
freebayes -f ref.fa sample1.sorted.bam > sample1.vcf
```

```
freebayes -f ref.fa --min-coverage 8 -F 0.01 -q 15 -P 0.05 sample1.sorted.bam > sample1-mod.vcf
```

#### **iVar:**

```
samtools mpileup -aa -A -d 1000000 -B -Q 0 sample1.sorted.bam | ivar variants -p sample1-ivar.tsv -q 20 -t 0.03 -r ref.fa
```

#iVar generates tsv file. This python script converts tsv to vcf format

```
python3 ivar_tsv_to_vcf.py $ sample1-ivar.tsv $ sample1-ivar.vcf
```

#### **lofreq:**

To add indel quality score into bam file

```
lofreq indelqual -f ref.fa --dindel -o sample-indel.bam sample.bam
```

To run

```
lofreq call-parallel --pp-threads 10 --call-indels -f ref.fa -o sample-indel.vcf sample-indel.bam
```

#### **varscan:**

```
samtools mpileup -f ref.fa -q 10 -d 1000000 sample1.sorted.bam > sample1.pileup
```

```
cat sample1.pileup | awk 'BEGIN {FS="\t";OFS="\t";print "#chr","position","refbase","coverage"} {print $1,$2,$3,$4}' > sample1.cov.tsv
```

```
varscan pileup2snp sample1.pileup --p-value 0.05 > sample1.varscan.tsv
```

```
sequenza-utils pileup2acgt -p sample1.pileup > sample1.acgt.tsv
```

```
varscan pileup2indel sample1.pileup --p-value 0.05 > sample1.varscan.indel.tsv
```

```
varscan mpileup2snp sample1.pileup --p-value 0.05--output-vcf 1 > sample1-snps.vcf
```

```
varscan mpileup2indel sample1.pileup --p-value 0.05 --output-vcf 1 > sample1-indel.vcf
```

```
vcfcats sample1-snps.vcf sample1-indel.vcf > sample1.vcf
```

```
bgzip sample1-snps.vcf
```

```
bgzip sample1-indel.vcf
```

```
bcftools index sample1-snps.vcf.gz
```

```
bcftools index sample1-indel.vcf.gz
```

```
bcftools concat sample1-snps.vcf.gz sample1-indel.vcf.gz -o sample1-merged.vcf
```

### **GATK Haplotypecaller:**

```
picard AddOrReplaceReadGroups I=sample.bam O=sample-dedup.bam RGID=4 RGLB=lib1  
RGPL=ILLUMINA RGPU=unit1 RGSM=20
```

```
gatk --java-options "-Xmx4g" MarkDuplicatesSpark -I sample-dedup.bam -O sample-dedup-  
Markdup.bam
```

```
gatk --java-options "-Xmx4g" HaplotypeCaller -R ref.fa -I sample-dedup-Markdup.bam -O  
sample.vcf
```

### **Quasimodo:**

To run quasimodo with 4 or less vcf files

```
python3 run_benchmark.py vareval -t 20 -c ~/miniconda3/envs -v sample2.vcf,sample2.vcf,  
sample3.vcf, sample4.vcf -r ref.fa,variant.fa -o OUTPUT_DIR
```

To run quasimodo with more than 4 files

```
python3 run_benchmark.py vareval --novenn -t 20 -c ~/miniconda3/envs -v  
sample2.vcf,sample2.vcf,sample3.vcf,sample4.vcf.....samplen.vcf -r ref.fa,variant.fa -o  
OUTPUT_DIR
```

### **Frequency Plots:**

**Commands used to extract values from vcf files.**

#### **BCFtools**

```
bcftools query -f '%POS\t%INFO/DP\t%INFO/DP4\n' vcf_file_name
```

#### **VarScan**

```
bcftools query -f '%POS\t%FORMAT/FREQ\n' vcf_file_name
```

#### **iVar**

```
bcftools query -f '%POS\t%FORMAT/ALT_FREQ\n' vcf_file_name
```

#### **LoFreq**

```
bcftools query -f '%POS\t%INFO/AF\n' vcf_file_name
```

### **FreeBayes**

```
bcftools query -f '%POS\t%INFO/DP\t%INFO/DPB\t%INFO/SRF\t%INFO/SRR\t%INFO/SAF\t%INFO/SAR\n' vcf_file_name
```

### **GATK**

```
bcftools query -f '%POS\t%FORMAT\n' vcf_file_name
```
